# Supplementary material for: Porcine Processed Animal Protein can be used as an alternative protein in modern broiler diets without any apparent detrimental effects on the bird’s microbiome, productivity, health and welfare
Source: Research Square preprint supplement (doi:10.21203/rs.3.rs-8309362/v1), 2026-01-13
Supplement: Supplementary file 1 [file 2cb1270f206c6a87b74501ef.xlsx]

## Sheet: supp_TableS1_welfare
Treatment	Score 0	Score 1	Score 2	Score 3	Score 4	Score 5
Day 21 – Pododermatitis
T1 – CON1	47.75	39.64	11.71	0.9	0	0
T2 – CON1 + PPAP5	52.21	35.4	11.5	0.88	0	0			Table S1 Pododermatitis and hockburn score distribution of frequency tables at day 21 and 32 for pododermatitis and day 32 for hockburn. Industry standard formulation including SBM, T2; a copy of T1 with reduced levels of SBM and a 5% inclusion of PPAP, T3; a copy of T1 with further reduced levels of SBM and a 10% inclusion of PPAP. T4; all-vegetable diet with Zero SBM present, T5; copy of T4 wit…
T3 – CON1 + PPAP10	40.18	46.43	11.61	1.79	0	0
T4 – CON2	28.83	32.43	33.33	5.41	0	0
T5 – CON2 + PPAP5	39.45	38.53	16.51	5.5	0	0
T6 – CON2 + PPAP10	32.73	44.55	18.18	4.55	0	0
Day 32 – Pododermatitis
T1 – CON1	44.44	30.3	21.21	4.04	0	0
T2 – CON1 + PPAP5	44.55	31.68	20.79	2.97	0	0
T3 – CON1 + PPAP10	26	45	25	2	2	0
T4 – CON2	43.16	35.79	15.79	5.26	0	0
T5 – CON2 + PPAP5	42.27	24.74	15.46	17.53	0	0
T6 – CON2 + PPAP10	40.21	21.65	22.68	14.43	1.03	0
Day 32 – Hockburn
T1 – CON1	52.04	18.37	17.35	9.18	3.06	0
T2 – CON1 + PPAP5	56	21	13	6	4	0
T3 – CON1 + PPAP10	52.53	17.17	18.18	9.09	3.03	0
T4 – CON2	48.94	31.91	14.89	3.19	1.06	0
T5 – CON2 + PPAP5	69.07	19.59	8.25	3.09	0	0
T6 – CON2 + PPAP10	59.6	18.18	16.16	5.05	1.01	0

## Sheet: supp_TableS2_poscontrol
Genus	Positive control	Genomic DNA
g__Actinomyces Total	0.0008
g__Bacillus Total	0.1205	0.12
g__Cryptococcus Total	0.0013	0.02
g__Enterococcus Total	0.1088	0.12
g__Escherichia Total	0.1739	0.12
g__Juglans Total	0.0001
g__Limosilactobacillus Total	0.0734	0.12
g__Listeria Total	0.1043	0.12
g__Pseudomonas Total	0.1119	0.12
g__Saccharomyces Total	0.0187	0.02
g__Salmonella Total	0.1538	0.12
g__Staphylococcus Total	0.132	0.12
g__unknown Total	0.0006
g__Homo Total	0

## Sheet: supp_TableS3_diversitystats
Index	pairs	p.value	adjusted_p
bray-curtis	D10 vs D21	0.001	0.001
bray-curtis	D10 vs D32	0.001	0.001
bray-curtis	D21 vs D32	0.001	0.001
bray-curtis	T1 vs T2	0.324	0.373846
bray-curtis	T1 vs T3	0.462	0.495
bray-curtis	T1 vs T4	0.188	0.256364
bray-curtis	T1 vs T5	0.094	0.166667
bray-curtis	T1 vs T6	0.088	0.166667
bray-curtis	T2 vs T3	0.867	0.867
bray-curtis	T2 vs T4	0.074	0.166667
bray-curtis	T2 vs T5	0.014	0.166667
bray-curtis	T2 vs T6	0.185	0.256364
bray-curtis	T3 vs T4	0.094	0.166667
bray-curtis	T3 vs T5	0.055	0.166667
bray-curtis	T3 vs T6	0.311	0.373846
bray-curtis	T4 vs T5	0.061	0.166667
bray-curtis	T4 vs T6	0.063	0.166667
bray-curtis	T5 vs T6	0.1	0.166667
bray-curtis	T1_D10 vs T1_D21	0.105	0.147385
bray-curtis	T1_D10 vs T1_D32	0.033	0.0725769
bray-curtis	T1_D10 vs T2_D10	0.598	0.636437
bray-curtis	T1_D10 vs T2_D21	0.029	0.0725769
bray-curtis	T1_D10 vs T2_D32	0.027	0.0725769
bray-curtis	T1_D10 vs T3_D10	0.051	0.0886705
bray-curtis	T1_D10 vs T3_D21	0.027	0.0725769
bray-curtis	T1_D10 vs T3_D32	0.034	0.0725769
bray-curtis	T1_D10 vs T4_D10	0.022	0.0725769
bray-curtis	T1_D10 vs T4_D21	0.025	0.0725769
bray-curtis	T1_D10 vs T4_D32	0.032	0.0725769
bray-curtis	T1_D10 vs T5_D10	0.023	0.0725769
bray-curtis	T1_D10 vs T5_D21	0.03	0.0725769
bray-curtis	T1_D10 vs T5_D32	0.03	0.0725769
bray-curtis	T1_D10 vs T6_D10	0.03	0.0725769
bray-curtis	T1_D10 vs T6_D21	0.023	0.0725769
bray-curtis	T1_D10 vs T6_D32	0.039	0.0736667
bray-curtis	T1_D21 vs T1_D32	0.944	0.949
bray-curtis	T1_D21 vs T2_D10	0.055	0.0935
bray-curtis	T1_D21 vs T2_D21	0.227	0.267162
bray-curtis	T1_D21 vs T2_D32	0.316	0.3555
bray-curtis	T1_D21 vs T3_D10	0.028	0.0725769
bray-curtis	T1_D21 vs T3_D21	0.949	0.949
bray-curtis	T1_D21 vs T3_D32	0.154	0.20444
bray-curtis	T1_D21 vs T4_D10	0.034	0.0725769
bray-curtis	T1_D21 vs T4_D21	0.178	0.222659
bray-curtis	T1_D21 vs T4_D32	0.208	0.250583
bray-curtis	T1_D21 vs T5_D10	0.186	0.2295
bray-curtis	T1_D21 vs T5_D21	0.225	0.26686
bray-curtis	T1_D21 vs T5_D32	0.088	0.129462
bray-curtis	T1_D21 vs T6_D10	0.053	0.0911124
bray-curtis	T1_D21 vs T6_D21	0.359	0.400927
bray-curtis	T1_D21 vs T6_D32	0.23	0.268626
bray-curtis	T1_D32 vs T2_D10	0.025	0.0725769
bray-curtis	T1_D32 vs T2_D21	0.219	0.261773
bray-curtis	T1_D32 vs T2_D32	0.756	0.77112
bray-curtis	T1_D32 vs T3_D10	0.037	0.0725769
bray-curtis	T1_D32 vs T3_D21	0.599	0.636437
bray-curtis	T1_D32 vs T3_D32	0.712	0.739155
bray-curtis	T1_D32 vs T4_D10	0.023	0.0725769
bray-curtis	T1_D32 vs T4_D21	0.108	0.150218
bray-curtis	T1_D32 vs T4_D32	0.166	0.21165
bray-curtis	T1_D32 vs T5_D10	0.025	0.0725769
bray-curtis	T1_D32 vs T5_D21	0.029	0.0725769
bray-curtis	T1_D32 vs T5_D32	0.315	0.3555
bray-curtis	T1_D32 vs T6_D10	0.035	0.0725769
bray-curtis	T1_D32 vs T6_D21	0.155	0.20444
bray-curtis	T1_D32 vs T6_D32	0.586	0.631394
bray-curtis	T2_D10 vs T2_D21	0.028	0.0725769
bray-curtis	T2_D10 vs T2_D32	0.026	0.0725769
bray-curtis	T2_D10 vs T3_D10	0.426	0.468906
bray-curtis	T2_D10 vs T3_D21	0.025	0.0725769
bray-curtis	T2_D10 vs T3_D32	0.019	0.0725769
bray-curtis	T2_D10 vs T4_D10	0.09	0.131143
bray-curtis	T2_D10 vs T4_D21	0.028	0.0725769
bray-curtis	T2_D10 vs T4_D32	0.028	0.0725769
bray-curtis	T2_D10 vs T5_D10	0.021	0.0725769
bray-curtis	T2_D10 vs T5_D21	0.018	0.0725769
bray-curtis	T2_D10 vs T5_D32	0.033	0.0725769
bray-curtis	T2_D10 vs T6_D10	0.061	0.0972187
bray-curtis	T2_D10 vs T6_D21	0.041	0.0755783
bray-curtis	T2_D10 vs T6_D32	0.069	0.107724
bray-curtis	T2_D21 vs T2_D32	0.521	0.569379
bray-curtis	T2_D21 vs T3_D10	0.031	0.0725769
bray-curtis	T2_D21 vs T3_D21	0.781	0.791344
bray-curtis	T2_D21 vs T3_D32	0.15	0.201316
bray-curtis	T2_D21 vs T4_D10	0.032	0.0725769
bray-curtis	T2_D21 vs T4_D21	0.058	0.0954194
bray-curtis	T2_D21 vs T4_D32	0.028	0.0725769
bray-curtis	T2_D21 vs T5_D10	0.037	0.0725769
bray-curtis	T2_D21 vs T5_D21	0.031	0.0725769
bray-curtis	T2_D21 vs T5_D32	0.049	0.0861724
bray-curtis	T2_D21 vs T6_D10	0.061	0.0972187
bray-curtis	T2_D21 vs T6_D21	0.16	0.207458
bray-curtis	T2_D21 vs T6_D32	0.171	0.216223
bray-curtis	T2_D32 vs T3_D10	0.026	0.0725769
bray-curtis	T2_D32 vs T3_D21	0.739	0.758839
bray-curtis	T2_D32 vs T3_D32	0.613	0.646821
bray-curtis	T2_D32 vs T4_D10	0.033	0.0725769
bray-curtis	T2_D32 vs T4_D21	0.096	0.136
bray-curtis	T2_D32 vs T4_D32	0.029	0.0725769
bray-curtis	T2_D32 vs T5_D10	0.038	0.0735949
bray-curtis	T2_D32 vs T5_D21	0.03	0.0725769
bray-curtis	T2_D32 vs T5_D32	0.164	0.210857
bray-curtis	T2_D32 vs T6_D10	0.034	0.0725769
bray-curtis	T2_D32 vs T6_D21	0.282	0.326864
bray-curtis	T2_D32 vs T6_D32	0.143	0.193619
bray-curtis	T3_D10 vs T3_D21	0.03	0.0725769
bray-curtis	T3_D10 vs T3_D32	0.024	0.0725769
bray-curtis	T3_D10 vs T4_D10	0.026	0.0725769
bray-curtis	T3_D10 vs T4_D21	0.025	0.0725769
bray-curtis	T3_D10 vs T4_D32	0.029	0.0725769
bray-curtis	T3_D10 vs T5_D10	0.021	0.0725769
bray-curtis	T3_D10 vs T5_D21	0.036	0.0725769
bray-curtis	T3_D10 vs T5_D32	0.027	0.0725769
bray-curtis	T3_D10 vs T6_D10	0.021	0.0725769
bray-curtis	T3_D10 vs T6_D21	0.033	0.0725769
bray-curtis	T3_D10 vs T6_D32	0.041	0.0755783
bray-curtis	T3_D21 vs T3_D32	0.087	0.129233
bray-curtis	T3_D21 vs T4_D10	0.035	0.0725769
bray-curtis	T3_D21 vs T4_D21	0.043	0.0774
bray-curtis	T3_D21 vs T4_D32	0.036	0.0725769
bray-curtis	T3_D21 vs T5_D10	0.064	0.100948
bray-curtis	T3_D21 vs T5_D21	0.086	0.129
bray-curtis	T3_D21 vs T5_D32	0.07	0.108182
bray-curtis	T3_D21 vs T6_D10	0.061	0.0972187
bray-curtis	T3_D21 vs T6_D21	0.715	0.739155
bray-curtis	T3_D21 vs T6_D32	0.191	0.233784
bray-curtis	T3_D32 vs T4_D10	0.032	0.0725769
bray-curtis	T3_D32 vs T4_D21	0.016	0.0725769
bray-curtis	T3_D32 vs T4_D32	0.042	0.0765
bray-curtis	T3_D32 vs T5_D10	0.023	0.0725769
bray-curtis	T3_D32 vs T5_D21	0.026	0.0725769
bray-curtis	T3_D32 vs T5_D32	0.046	0.0818372
bray-curtis	T3_D32 vs T6_D10	0.032	0.0725769
bray-curtis	T3_D32 vs T6_D21	0.028	0.0725769
bray-curtis	T3_D32 vs T6_D32	0.112	0.154378
bray-curtis	T4_D10 vs T4_D21	0.021	0.0725769
bray-curtis	T4_D10 vs T4_D32	0.024	0.0725769
bray-curtis	T4_D10 vs T5_D10	0.026	0.0725769
bray-curtis	T4_D10 vs T5_D21	0.029	0.0725769
bray-curtis	T4_D10 vs T5_D32	0.034	0.0725769
bray-curtis	T4_D10 vs T6_D10	0.035	0.0725769
bray-curtis	T4_D10 vs T6_D21	0.024	0.0725769
bray-curtis	T4_D10 vs T6_D32	0.033	0.0725769
bray-curtis	T4_D21 vs T4_D32	0.293	0.33706
bray-curtis	T4_D21 vs T5_D10	0.037	0.0725769
bray-curtis	T4_D21 vs T5_D21	0.082	0.124218
bray-curtis	T4_D21 vs T5_D32	0.027	0.0725769
bray-curtis	T4_D21 vs T6_D10	0.032	0.0725769
bray-curtis	T4_D21 vs T6_D21	0.179	0.222659
bray-curtis	T4_D21 vs T6_D32	0.094	0.135679
bray-curtis	T4_D32 vs T5_D10	0.021	0.0725769
bray-curtis	T4_D32 vs T5_D21	0.058	0.0954194
bray-curtis	T4_D32 vs T5_D32	0.034	0.0725769
bray-curtis	T4_D32 vs T6_D10	0.039	0.0736667
bray-curtis	T4_D32 vs T6_D21	0.026	0.0725769
bray-curtis	T4_D32 vs T6_D32	0.313	0.3555
bray-curtis	T5_D10 vs T5_D21	0.031	0.0725769
bray-curtis	T5_D10 vs T5_D32	0.027	0.0725769
bray-curtis	T5_D10 vs T6_D10	0.38	0.421304
bray-curtis	T5_D10 vs T6_D21	0.095	0.135841
bray-curtis	T5_D10 vs T6_D32	0.056	0.0941538
bray-curtis	T5_D21 vs T5_D32	0.017	0.0725769
bray-curtis	T5_D21 vs T6_D10	0.028	0.0725769
bray-curtis	T5_D21 vs T6_D21	0.202	0.245286
bray-curtis	T5_D21 vs T6_D32	0.031	0.0725769
bray-curtis	T5_D32 vs T6_D10	0.024	0.0725769
bray-curtis	T5_D32 vs T6_D21	0.16	0.207458
bray-curtis	T5_D32 vs T6_D32	0.575	0.623936
bray-curtis	T6_D10 vs T6_D21	0.123	0.168027
bray-curtis	T6_D10 vs T6_D32	0.082	0.124218
bray-curtis	T6_D21 vs T6_D32	0.668	0.700027
inverse_simpson	D21 vs D10	n/a	0.910555
inverse_simpson	D32 vs D10	n/a	0.910555
inverse_simpson	D32 vs D21	n/a	0.910555
inverse_simpson	T2 vs T1	n/a	0.49813
inverse_simpson	T3 vs T1	n/a	0.49813
inverse_simpson	T4 vs T1	n/a	0.998893
inverse_simpson	T5 vs T1	n/a	0.290409
inverse_simpson	T6 vs T1	n/a	0.290409
inverse_simpson	T3 vs T2	n/a	1
inverse_simpson	T4 vs T2	n/a	0.49813
inverse_simpson	T5 vs T2	n/a	0.804376
inverse_simpson	T6 vs T2	n/a	0.838324
inverse_simpson	T4 vs T3	n/a	0.49813
inverse_simpson	T5 vs T3	n/a	0.632232
inverse_simpson	T6 vs T3	n/a	0.853729
inverse_simpson	T5 vs T4	n/a	0.298285
inverse_simpson	T6 vs T4	n/a	0.332752
inverse_simpson	T6 vs T5	n/a	0.804376
inverse_simpson	T1_D21 vs T1_D10	n/a	0.85
inverse_simpson	T1_D32 vs T1_D10	n/a	0.85
inverse_simpson	T2_D10 vs T1_D10	n/a	0.974923
inverse_simpson	T2_D21 vs T1_D10	n/a	0.974923
inverse_simpson	T2_D32 vs T1_D10	n/a	0.974923
inverse_simpson	T3_D10 vs T1_D10	n/a	1
inverse_simpson	T3_D21 vs T1_D10	n/a	0.974923
inverse_simpson	T3_D32 vs T1_D10	n/a	1
inverse_simpson	T4_D10 vs T1_D10	n/a	0.672527
inverse_simpson	T4_D21 vs T1_D10	n/a	0.974923
inverse_simpson	T4_D32 vs T1_D10	n/a	0.974923
inverse_simpson	T5_D10 vs T1_D10	n/a	0.85
inverse_simpson	T5_D21 vs T1_D10	n/a	1
inverse_simpson	T5_D32 vs T1_D10	n/a	0.974923
inverse_simpson	T6_D10 vs T1_D10	n/a	0.974923
inverse_simpson	T6_D21 vs T1_D10	n/a	0.974923
inverse_simpson	T6_D32 vs T1_D10	n/a	0.974923
inverse_simpson	T1_D32 vs T1_D21	n/a	0.974923
inverse_simpson	T2_D10 vs T1_D21	n/a	0.974923
inverse_simpson	T2_D21 vs T1_D21	n/a	0.974923
inverse_simpson	T2_D32 vs T1_D21	n/a	0.85
inverse_simpson	T3_D10 vs T1_D21	n/a	0.85
inverse_simpson	T3_D21 vs T1_D21	n/a	0.85
inverse_simpson	T3_D32 vs T1_D21	n/a	0.974923
inverse_simpson	T4_D10 vs T1_D21	n/a	0.974923
inverse_simpson	T4_D21 vs T1_D21	n/a	0.974923
inverse_simpson	T4_D32 vs T1_D21	n/a	0.85
inverse_simpson	T5_D10 vs T1_D21	n/a	0.672527
inverse_simpson	T5_D21 vs T1_D21	n/a	0.85
inverse_simpson	T5_D32 vs T1_D21	n/a	0.85
inverse_simpson	T6_D10 vs T1_D21	n/a	0.672527
inverse_simpson	T6_D21 vs T1_D21	n/a	0.672527
inverse_simpson	T6_D32 vs T1_D21	n/a	0.974923
inverse_simpson	T2_D10 vs T1_D32	n/a	0.974923
inverse_simpson	T2_D21 vs T1_D32	n/a	0.974923
inverse_simpson	T2_D32 vs T1_D32	n/a	0.85
inverse_simpson	T3_D10 vs T1_D32	n/a	0.974923
inverse_simpson	T3_D21 vs T1_D32	n/a	0.974923
inverse_simpson	T3_D32 vs T1_D32	n/a	0.974923
inverse_simpson	T4_D10 vs T1_D32	n/a	0.85
inverse_simpson	T4_D21 vs T1_D32	n/a	0.974923
inverse_simpson	T4_D32 vs T1_D32	n/a	0.85
inverse_simpson	T5_D10 vs T1_D32	n/a	0.672527
inverse_simpson	T5_D21 vs T1_D32	n/a	0.974923
inverse_simpson	T5_D32 vs T1_D32	n/a	0.974923
inverse_simpson	T6_D10 vs T1_D32	n/a	0.85
inverse_simpson	T6_D21 vs T1_D32	n/a	0.85
inverse_simpson	T6_D32 vs T1_D32	n/a	0.974923
inverse_simpson	T2_D21 vs T2_D10	n/a	0.974923
inverse_simpson	T2_D32 vs T2_D10	n/a	0.974923
inverse_simpson	T3_D10 vs T2_D10	n/a	0.974923
inverse_simpson	T3_D21 vs T2_D10	n/a	0.974923
inverse_simpson	T3_D32 vs T2_D10	n/a	0.974923
inverse_simpson	T4_D10 vs T2_D10	n/a	0.974923
inverse_simpson	T4_D21 vs T2_D10	n/a	0.974923
inverse_simpson	T4_D32 vs T2_D10	n/a	0.974923
inverse_simpson	T5_D10 vs T2_D10	n/a	1
inverse_simpson	T5_D21 vs T2_D10	n/a	0.974923
inverse_simpson	T5_D32 vs T2_D10	n/a	0.974923
inverse_simpson	T6_D10 vs T2_D10	n/a	0.974923
inverse_simpson	T6_D21 vs T2_D10	n/a	0.974923
inverse_simpson	T6_D32 vs T2_D10	n/a	0.974923
inverse_simpson	T2_D32 vs T2_D21	n/a	0.974923
inverse_simpson	T3_D10 vs T2_D21	n/a	0.974923
inverse_simpson	T3_D21 vs T2_D21	n/a	0.974923
inverse_simpson	T3_D32 vs T2_D21	n/a	1
inverse_simpson	T4_D10 vs T2_D21	n/a	0.672527
inverse_simpson	T4_D21 vs T2_D21	n/a	0.974923
inverse_simpson	T4_D32 vs T2_D21	n/a	0.974923
inverse_simpson	T5_D10 vs T2_D21	n/a	0.85
inverse_simpson	T5_D21 vs T2_D21	n/a	0.974923
inverse_simpson	T5_D32 vs T2_D21	n/a	0.974923
inverse_simpson	T6_D10 vs T2_D21	n/a	0.974923
inverse_simpson	T6_D21 vs T2_D21	n/a	0.974923
inverse_simpson	T6_D32 vs T2_D21	n/a	0.974923
inverse_simpson	T3_D10 vs T2_D32	n/a	1
inverse_simpson	T3_D21 vs T2_D32	n/a	0.974923
inverse_simpson	T3_D32 vs T2_D32	n/a	0.974923
inverse_simpson	T4_D10 vs T2_D32	n/a	0.85
inverse_simpson	T4_D21 vs T2_D32	n/a	0.974923
inverse_simpson	T4_D32 vs T2_D32	n/a	0.974923
inverse_simpson	T5_D10 vs T2_D32	n/a	0.974923
inverse_simpson	T5_D21 vs T2_D32	n/a	0.974923
inverse_simpson	T5_D32 vs T2_D32	n/a	0.974923
inverse_simpson	T6_D10 vs T2_D32	n/a	0.974923
inverse_simpson	T6_D21 vs T2_D32	n/a	0.974923
inverse_simpson	T6_D32 vs T2_D32	n/a	0.974923
inverse_simpson	T3_D21 vs T3_D10	n/a	0.974923
inverse_simpson	T3_D32 vs T3_D10	n/a	0.974923
inverse_simpson	T4_D10 vs T3_D10	n/a	0.672527
inverse_simpson	T4_D21 vs T3_D10	n/a	0.974923
inverse_simpson	T4_D32 vs T3_D10	n/a	0.974923
inverse_simpson	T5_D10 vs T3_D10	n/a	0.974923
inverse_simpson	T5_D21 vs T3_D10	n/a	1
inverse_simpson	T5_D32 vs T3_D10	n/a	0.974923
inverse_simpson	T6_D10 vs T3_D10	n/a	0.974923
inverse_simpson	T6_D21 vs T3_D10	n/a	0.974923
inverse_simpson	T6_D32 vs T3_D10	n/a	0.974923
inverse_simpson	T3_D32 vs T3_D21	n/a	0.974923
inverse_simpson	T4_D10 vs T3_D21	n/a	0.85
inverse_simpson	T4_D21 vs T3_D21	n/a	0.974923
inverse_simpson	T4_D32 vs T3_D21	n/a	0.974923
inverse_simpson	T5_D10 vs T3_D21	n/a	0.974923
inverse_simpson	T5_D21 vs T3_D21	n/a	0.974923
inverse_simpson	T5_D32 vs T3_D21	n/a	0.974923
inverse_simpson	T6_D10 vs T3_D21	n/a	0.974923
inverse_simpson	T6_D21 vs T3_D21	n/a	1
inverse_simpson	T6_D32 vs T3_D21	n/a	0.974923
inverse_simpson	T4_D10 vs T3_D32	n/a	0.974923
inverse_simpson	T4_D21 vs T3_D32	n/a	1
inverse_simpson	T4_D32 vs T3_D32	n/a	1
inverse_simpson	T5_D10 vs T3_D32	n/a	0.85
inverse_simpson	T5_D21 vs T3_D32	n/a	0.974923
inverse_simpson	T5_D32 vs T3_D32	n/a	0.974923
inverse_simpson	T6_D10 vs T3_D32	n/a	0.974923
inverse_simpson	T6_D21 vs T3_D32	n/a	0.974923
inverse_simpson	T6_D32 vs T3_D32	n/a	0.974923
inverse_simpson	T4_D21 vs T4_D10	n/a	0.85
inverse_simpson	T4_D32 vs T4_D10	n/a	0.672527
inverse_simpson	T5_D10 vs T4_D10	n/a	0.672527
inverse_simpson	T5_D21 vs T4_D10	n/a	0.672527
inverse_simpson	T5_D32 vs T4_D10	n/a	0.672527
inverse_simpson	T6_D10 vs T4_D10	n/a	0.672527
inverse_simpson	T6_D21 vs T4_D10	n/a	0.672527
inverse_simpson	T6_D32 vs T4_D10	n/a	0.85
inverse_simpson	T4_D32 vs T4_D21	n/a	0.974923
inverse_simpson	T5_D10 vs T4_D21	n/a	0.85
inverse_simpson	T5_D21 vs T4_D21	n/a	1
inverse_simpson	T5_D32 vs T4_D21	n/a	0.974923
inverse_simpson	T6_D10 vs T4_D21	n/a	0.974923
inverse_simpson	T6_D21 vs T4_D21	n/a	0.974923
inverse_simpson	T6_D32 vs T4_D21	n/a	1
inverse_simpson	T5_D10 vs T4_D32	n/a	0.85
inverse_simpson	T5_D21 vs T4_D32	n/a	0.974923
inverse_simpson	T5_D32 vs T4_D32	n/a	1
inverse_simpson	T6_D10 vs T4_D32	n/a	0.974923
inverse_simpson	T6_D21 vs T4_D32	n/a	0.974923
inverse_simpson	T6_D32 vs T4_D32	n/a	0.974923
inverse_simpson	T5_D21 vs T5_D10	n/a	0.85
inverse_simpson	T5_D32 vs T5_D10	n/a	0.974923
inverse_simpson	T6_D10 vs T5_D10	n/a	0.974923
inverse_simpson	T6_D21 vs T5_D10	n/a	0.974923
inverse_simpson	T6_D32 vs T5_D10	n/a	0.974923
inverse_simpson	T5_D32 vs T5_D21	n/a	0.974923
inverse_simpson	T6_D10 vs T5_D21	n/a	0.974923
inverse_simpson	T6_D21 vs T5_D21	n/a	0.974923
inverse_simpson	T6_D32 vs T5_D21	n/a	0.974923
inverse_simpson	T6_D10 vs T5_D32	n/a	0.974923
inverse_simpson	T6_D21 vs T5_D32	n/a	1
inverse_simpson	T6_D32 vs T5_D32	n/a	0.974923
inverse_simpson	T6_D21 vs T6_D10	n/a	0.974923
inverse_simpson	T6_D32 vs T6_D10	n/a	0.974923
inverse_simpson	T6_D32 vs T6_D21	n/a	0.974923
shannon	D21 vs D10	n/a	0.874394
shannon	D32 vs D10	n/a	0.642606
shannon	D32 vs D21	n/a	0.515576
shannon	T2 vs T1	n/a	0.47367
shannon	T3 vs T1	n/a	0.47367
shannon	T4 vs T1	n/a	0.975933
shannon	T5 vs T1	n/a	0.0545494
shannon	T6 vs T1	n/a	0.256355
shannon	T3 vs T2	n/a	0.975933
shannon	T4 vs T2	n/a	0.47367
shannon	T5 vs T2	n/a	0.47367
shannon	T6 vs T2	n/a	0.642153
shannon	T4 vs T3	n/a	0.47367
shannon	T5 vs T3	n/a	0.47367
shannon	T6 vs T3	n/a	0.47367
shannon	T5 vs T4	n/a	0.108694
shannon	T6 vs T4	n/a	0.256355
shannon	T6 vs T5	n/a	0.975933
shannon	T1_D21 vs T1_D10	n/a	1
shannon	T1_D32 vs T1_D10	n/a	1
shannon	T2_D10 vs T1_D10	n/a	1
shannon	T2_D21 vs T1_D10	n/a	1
shannon	T2_D32 vs T1_D10	n/a	0.564055
shannon	T3_D10 vs T1_D10	n/a	1
shannon	T3_D21 vs T1_D10	n/a	0.97782
shannon	T3_D32 vs T1_D10	n/a	0.97782
shannon	T4_D10 vs T1_D10	n/a	0.564055
shannon	T4_D21 vs T1_D10	n/a	1
shannon	T4_D32 vs T1_D10	n/a	0.874286
shannon	T5_D10 vs T1_D10	n/a	0.397403
shannon	T5_D21 vs T1_D10	n/a	0.874286
shannon	T5_D32 vs T1_D10	n/a	0.874286
shannon	T6_D10 vs T1_D10	n/a	0.874286
shannon	T6_D21 vs T1_D10	n/a	0.564055
shannon	T6_D32 vs T1_D10	n/a	1
shannon	T1_D32 vs T1_D21	n/a	0.874286
shannon	T2_D10 vs T1_D21	n/a	0.97782
shannon	T2_D21 vs T1_D21	n/a	0.874286
shannon	T2_D32 vs T1_D21	n/a	0.397403
shannon	T3_D10 vs T1_D21	n/a	0.97782
shannon	T3_D21 vs T1_D21	n/a	1
shannon	T3_D32 vs T1_D21	n/a	0.874286
shannon	T4_D10 vs T1_D21	n/a	0.874286
shannon	T4_D21 vs T1_D21	n/a	0.97782
shannon	T4_D32 vs T1_D21	n/a	0.397403
shannon	T5_D10 vs T1_D21	n/a	0.397403
shannon	T5_D21 vs T1_D21	n/a	0.564055
shannon	T5_D32 vs T1_D21	n/a	0.397403
shannon	T6_D10 vs T1_D21	n/a	0.874286
shannon	T6_D21 vs T1_D21	n/a	0.397403
shannon	T6_D32 vs T1_D21	n/a	1
shannon	T2_D10 vs T1_D32	n/a	1
shannon	T2_D21 vs T1_D32	n/a	0.97782
shannon	T2_D32 vs T1_D32	n/a	0.874286
shannon	T3_D10 vs T1_D32	n/a	1
shannon	T3_D21 vs T1_D32	n/a	1
shannon	T3_D32 vs T1_D32	n/a	1
shannon	T4_D10 vs T1_D32	n/a	0.397403
shannon	T4_D21 vs T1_D32	n/a	1
shannon	T4_D32 vs T1_D32	n/a	0.874286
shannon	T5_D10 vs T1_D32	n/a	0.397403
shannon	T5_D21 vs T1_D32	n/a	1
shannon	T5_D32 vs T1_D32	n/a	0.97782
shannon	T6_D10 vs T1_D32	n/a	0.874286
shannon	T6_D21 vs T1_D32	n/a	0.874286
shannon	T6_D32 vs T1_D32	n/a	1
shannon	T2_D21 vs T2_D10	n/a	1
shannon	T2_D32 vs T2_D10	n/a	1
shannon	T3_D10 vs T2_D10	n/a	1
shannon	T3_D21 vs T2_D10	n/a	1
shannon	T3_D32 vs T2_D10	n/a	1
shannon	T4_D10 vs T2_D10	n/a	0.97782
shannon	T4_D21 vs T2_D10	n/a	1
shannon	T4_D32 vs T2_D10	n/a	1
shannon	T5_D10 vs T2_D10	n/a	1
shannon	T5_D21 vs T2_D10	n/a	1
shannon	T5_D32 vs T2_D10	n/a	1
shannon	T6_D10 vs T2_D10	n/a	1
shannon	T6_D21 vs T2_D10	n/a	1
shannon	T6_D32 vs T2_D10	n/a	1
shannon	T2_D32 vs T2_D21	n/a	0.874286
shannon	T3_D10 vs T2_D21	n/a	1
shannon	T3_D21 vs T2_D21	n/a	1
shannon	T3_D32 vs T2_D21	n/a	0.97782
shannon	T4_D10 vs T2_D21	n/a	0.397403
shannon	T4_D21 vs T2_D21	n/a	1
shannon	T4_D32 vs T2_D21	n/a	0.397403
shannon	T5_D10 vs T2_D21	n/a	0.397403
shannon	T5_D21 vs T2_D21	n/a	0.564055
shannon	T5_D32 vs T2_D21	n/a	0.874286
shannon	T6_D10 vs T2_D21	n/a	0.874286
shannon	T6_D21 vs T2_D21	n/a	0.874286
shannon	T6_D32 vs T2_D21	n/a	1
shannon	T3_D10 vs T2_D32	n/a	0.874286
shannon	T3_D21 vs T2_D32	n/a	1
shannon	T3_D32 vs T2_D32	n/a	1
shannon	T4_D10 vs T2_D32	n/a	0.397403
shannon	T4_D21 vs T2_D32	n/a	0.97782
shannon	T4_D32 vs T2_D32	n/a	0.874286
shannon	T5_D10 vs T2_D32	n/a	1
shannon	T5_D21 vs T2_D32	n/a	0.97782
shannon	T5_D32 vs T2_D32	n/a	1
shannon	T6_D10 vs T2_D32	n/a	1
shannon	T6_D21 vs T2_D32	n/a	1
shannon	T6_D32 vs T2_D32	n/a	1
shannon	T3_D21 vs T3_D10	n/a	1
shannon	T3_D32 vs T3_D10	n/a	1
shannon	T4_D10 vs T3_D10	n/a	0.564055
shannon	T4_D21 vs T3_D10	n/a	1
shannon	T4_D32 vs T3_D10	n/a	1
shannon	T5_D10 vs T3_D10	n/a	0.397403
shannon	T5_D21 vs T3_D10	n/a	1
shannon	T5_D32 vs T3_D10	n/a	1
shannon	T6_D10 vs T3_D10	n/a	0.97782
shannon	T6_D21 vs T3_D10	n/a	0.874286
shannon	T6_D32 vs T3_D10	n/a	1
shannon	T3_D32 vs T3_D21	n/a	1
shannon	T4_D10 vs T3_D21	n/a	0.564055
shannon	T4_D21 vs T3_D21	n/a	1
shannon	T4_D32 vs T3_D21	n/a	1
shannon	T5_D10 vs T3_D21	n/a	1
shannon	T5_D21 vs T3_D21	n/a	1
shannon	T5_D32 vs T3_D21	n/a	1
shannon	T6_D10 vs T3_D21	n/a	1
shannon	T6_D21 vs T3_D21	n/a	0.97782
shannon	T6_D32 vs T3_D21	n/a	1
shannon	T4_D10 vs T3_D32	n/a	0.397403
shannon	T4_D21 vs T3_D32	n/a	1
shannon	T4_D32 vs T3_D32	n/a	1
shannon	T5_D10 vs T3_D32	n/a	0.874286
shannon	T5_D21 vs T3_D32	n/a	1
shannon	T5_D32 vs T3_D32	n/a	0.97782
shannon	T6_D10 vs T3_D32	n/a	1
shannon	T6_D21 vs T3_D32	n/a	0.97782
shannon	T6_D32 vs T3_D32	n/a	1
shannon	T4_D21 vs T4_D10	n/a	0.397403
shannon	T4_D32 vs T4_D10	n/a	0.397403
shannon	T5_D10 vs T4_D10	n/a	0.397403
shannon	T5_D21 vs T4_D10	n/a	0.397403
shannon	T5_D32 vs T4_D10	n/a	0.397403
shannon	T6_D10 vs T4_D10	n/a	0.397403
shannon	T6_D21 vs T4_D10	n/a	0.397403
shannon	T6_D32 vs T4_D10	n/a	0.97782
shannon	T4_D32 vs T4_D21	n/a	0.874286
shannon	T5_D10 vs T4_D21	n/a	0.564055
shannon	T5_D21 vs T4_D21	n/a	1
shannon	T5_D32 vs T4_D21	n/a	0.874286
shannon	T6_D10 vs T4_D21	n/a	1
shannon	T6_D21 vs T4_D21	n/a	0.874286
shannon	T6_D32 vs T4_D21	n/a	1
shannon	T5_D10 vs T4_D32	n/a	0.397403
shannon	T5_D21 vs T4_D32	n/a	1
shannon	T5_D32 vs T4_D32	n/a	1
shannon	T6_D10 vs T4_D32	n/a	0.874286
shannon	T6_D21 vs T4_D32	n/a	0.874286
shannon	T6_D32 vs T4_D32	n/a	1
shannon	T5_D21 vs T5_D10	n/a	0.564055
shannon	T5_D32 vs T5_D10	n/a	0.874286
shannon	T6_D10 vs T5_D10	n/a	1
shannon	T6_D21 vs T5_D10	n/a	1
shannon	T6_D32 vs T5_D10	n/a	1
shannon	T5_D32 vs T5_D21	n/a	1
shannon	T6_D10 vs T5_D21	n/a	0.874286
shannon	T6_D21 vs T5_D21	n/a	0.874286
shannon	T6_D32 vs T5_D21	n/a	1
shannon	T6_D10 vs T5_D32	n/a	1
shannon	T6_D21 vs T5_D32	n/a	1
shannon	T6_D32 vs T5_D32	n/a	1
shannon	T6_D21 vs T6_D10	n/a	1
shannon	T6_D32 vs T6_D10	n/a	1
shannon	T6_D32 vs T6_D21	n/a	1
chao	D21 vs D10	n/a	0.000281215
chao	D32 vs D10	n/a	0.000189209
chao	D32 vs D21	n/a	0.143163
chao	T2 vs T1	n/a	0.972503
chao	T3 vs T1	n/a	0.97696
chao	T4 vs T1	n/a	0.972503
chao	T5 vs T1	n/a	0.972503
chao	T6 vs T1	n/a	0.972503
chao	T3 vs T2	n/a	0.972503
chao	T4 vs T2	n/a	0.972503
chao	T5 vs T2	n/a	0.972503
chao	T6 vs T2	n/a	0.972503
chao	T4 vs T3	n/a	0.972503
chao	T5 vs T3	n/a	0.972503
chao	T6 vs T3	n/a	0.972503
chao	T5 vs T4	n/a	0.972503
chao	T6 vs T4	n/a	0.97696
chao	T6 vs T5	n/a	0.972503
chao	T1_D21 vs T1_D10	n/a	0.443478
chao	T1_D32 vs T1_D10	n/a	0.203322
chao	T2_D10 vs T1_D10	n/a	0.947652
chao	T2_D21 vs T1_D10	n/a	0.203322
chao	T2_D32 vs T1_D10	n/a	0.203322
chao	T3_D10 vs T1_D10	n/a	0.947652
chao	T3_D21 vs T1_D10	n/a	0.312245
chao	T3_D32 vs T1_D10	n/a	0.312245
chao	T4_D10 vs T1_D10	n/a	0.947652
chao	T4_D21 vs T1_D10	n/a	0.203322
chao	T4_D32 vs T1_D10	n/a	0.203322
chao	T5_D10 vs T1_D10	n/a	0.203322
chao	T5_D21 vs T1_D10	n/a	0.203322
chao	T5_D32 vs T1_D10	n/a	0.203322
chao	T6_D10 vs T1_D10	n/a	0.312245
chao	T6_D21 vs T1_D10	n/a	0.443478
chao	T6_D32 vs T1_D10	n/a	0.799078
chao	T1_D32 vs T1_D21	n/a	0.312245
chao	T2_D10 vs T1_D21	n/a	0.443478
chao	T2_D21 vs T1_D21	n/a	0.203322
chao	T2_D32 vs T1_D21	n/a	0.312245
chao	T3_D10 vs T1_D21	n/a	0.203322
chao	T3_D21 vs T1_D21	n/a	0.947652
chao	T3_D32 vs T1_D21	n/a	0.312245
chao	T4_D10 vs T1_D21	n/a	0.203322
chao	T4_D21 vs T1_D21	n/a	0.928445
chao	T4_D32 vs T1_D21	n/a	0.443478
chao	T5_D10 vs T1_D21	n/a	0.947652
chao	T5_D21 vs T1_D21	n/a	0.443478
chao	T5_D32 vs T1_D21	n/a	0.312245
chao	T6_D10 vs T1_D21	n/a	0.928445
chao	T6_D21 vs T1_D21	n/a	0.947652
chao	T6_D32 vs T1_D21	n/a	1
chao	T2_D10 vs T1_D32	n/a	0.203322
chao	T2_D21 vs T1_D32	n/a	1
chao	T2_D32 vs T1_D32	n/a	0.928445
chao	T3_D10 vs T1_D32	n/a	0.203322
chao	T3_D21 vs T1_D32	n/a	0.799078
chao	T3_D32 vs T1_D32	n/a	0.928445
chao	T4_D10 vs T1_D32	n/a	0.203322
chao	T4_D21 vs T1_D32	n/a	0.928445
chao	T4_D32 vs T1_D32	n/a	1
chao	T5_D10 vs T1_D32	n/a	0.655714
chao	T5_D21 vs T1_D32	n/a	0.928445
chao	T5_D32 vs T1_D32	n/a	0.947652
chao	T6_D10 vs T1_D32	n/a	0.655714
chao	T6_D21 vs T1_D32	n/a	0.312245
chao	T6_D32 vs T1_D32	n/a	0.799078
chao	T2_D21 vs T2_D10	n/a	0.203322
chao	T2_D32 vs T2_D10	n/a	0.203322
chao	T3_D10 vs T2_D10	n/a	0.947652
chao	T3_D21 vs T2_D10	n/a	0.312245
chao	T3_D32 vs T2_D10	n/a	0.312245
chao	T4_D10 vs T2_D10	n/a	0.947652
chao	T4_D21 vs T2_D10	n/a	0.203322
chao	T4_D32 vs T2_D10	n/a	0.203322
chao	T5_D10 vs T2_D10	n/a	0.312245
chao	T5_D21 vs T2_D10	n/a	0.203322
chao	T5_D32 vs T2_D10	n/a	0.203322
chao	T6_D10 vs T2_D10	n/a	0.443478
chao	T6_D21 vs T2_D10	n/a	0.443478
chao	T6_D32 vs T2_D10	n/a	0.655714
chao	T2_D32 vs T2_D21	n/a	0.947652
chao	T3_D10 vs T2_D21	n/a	0.203322
chao	T3_D21 vs T2_D21	n/a	0.655714
chao	T3_D32 vs T2_D21	n/a	0.928445
chao	T4_D10 vs T2_D21	n/a	0.203322
chao	T4_D21 vs T2_D21	n/a	0.799078
chao	T4_D32 vs T2_D21	n/a	0.928445
chao	T5_D10 vs T2_D21	n/a	0.443478
chao	T5_D21 vs T2_D21	n/a	0.655714
chao	T5_D32 vs T2_D21	n/a	0.947652
chao	T6_D10 vs T2_D21	n/a	0.655714
chao	T6_D21 vs T2_D21	n/a	0.312245
chao	T6_D32 vs T2_D21	n/a	0.928445
chao	T3_D10 vs T2_D32	n/a	0.203322
chao	T3_D21 vs T2_D32	n/a	0.799078
chao	T3_D32 vs T2_D32	n/a	0.947652
chao	T4_D10 vs T2_D32	n/a	0.203322
chao	T4_D21 vs T2_D32	n/a	0.928445
chao	T4_D32 vs T2_D32	n/a	1
chao	T5_D10 vs T2_D32	n/a	0.655714
chao	T5_D21 vs T2_D32	n/a	0.947652
chao	T5_D32 vs T2_D32	n/a	0.947652
chao	T6_D10 vs T2_D32	n/a	0.799078
chao	T6_D21 vs T2_D32	n/a	0.443478
chao	T6_D32 vs T2_D32	n/a	0.799078
chao	T3_D21 vs T3_D10	n/a	0.203322
chao	T3_D32 vs T3_D10	n/a	0.203322
chao	T4_D10 vs T3_D10	n/a	0.203322
chao	T4_D21 vs T3_D10	n/a	0.203322
chao	T4_D32 vs T3_D10	n/a	0.203322
chao	T5_D10 vs T3_D10	n/a	0.203322
chao	T5_D21 vs T3_D10	n/a	0.203322
chao	T5_D32 vs T3_D10	n/a	0.203322
chao	T6_D10 vs T3_D10	n/a	0.203322
chao	T6_D21 vs T3_D10	n/a	0.203322
chao	T6_D32 vs T3_D10	n/a	0.499592
chao	T3_D32 vs T3_D21	n/a	0.799078
chao	T4_D10 vs T3_D21	n/a	0.203322
chao	T4_D21 vs T3_D21	n/a	1
chao	T4_D32 vs T3_D21	n/a	0.928445
chao	T5_D10 vs T3_D21	n/a	0.928445
chao	T5_D21 vs T3_D21	n/a	0.947652
chao	T5_D32 vs T3_D21	n/a	0.799078
chao	T6_D10 vs T3_D21	n/a	1
chao	T6_D21 vs T3_D21	n/a	0.947652
chao	T6_D32 vs T3_D21	n/a	0.947652
chao	T4_D10 vs T3_D32	n/a	0.203322
chao	T4_D21 vs T3_D32	n/a	0.947652
chao	T4_D32 vs T3_D32	n/a	0.947652
chao	T5_D10 vs T3_D32	n/a	0.928445
chao	T5_D21 vs T3_D32	n/a	0.947652
chao	T5_D32 vs T3_D32	n/a	0.947652
chao	T6_D10 vs T3_D32	n/a	0.928445
chao	T6_D21 vs T3_D32	n/a	0.443478
chao	T6_D32 vs T3_D32	n/a	0.928445
chao	T4_D21 vs T4_D10	n/a	0.203322
chao	T4_D32 vs T4_D10	n/a	0.203322
chao	T5_D10 vs T4_D10	n/a	0.203322
chao	T5_D21 vs T4_D10	n/a	0.203322
chao	T5_D32 vs T4_D10	n/a	0.203322
chao	T6_D10 vs T4_D10	n/a	0.203322
chao	T6_D21 vs T4_D10	n/a	0.203322
chao	T6_D32 vs T4_D10	n/a	0.928445
chao	T4_D32 vs T4_D21	n/a	1
chao	T5_D10 vs T4_D21	n/a	0.799078
chao	T5_D21 vs T4_D21	n/a	0.947652
chao	T5_D32 vs T4_D21	n/a	0.928445
chao	T6_D10 vs T4_D21	n/a	0.799078
chao	T6_D21 vs T4_D21	n/a	0.928445
chao	T6_D32 vs T4_D21	n/a	0.947652
chao	T5_D10 vs T4_D32	n/a	0.312245
chao	T5_D21 vs T4_D32	n/a	0.947652
chao	T5_D32 vs T4_D32	n/a	0.947652
chao	T6_D10 vs T4_D32	n/a	0.655714
chao	T6_D21 vs T4_D32	n/a	0.443478
chao	T6_D32 vs T4_D32	n/a	0.947652
chao	T5_D21 vs T5_D10	n/a	0.655714
chao	T5_D32 vs T5_D10	n/a	0.443478
chao	T6_D10 vs T5_D10	n/a	0.928445
chao	T6_D21 vs T5_D10	n/a	0.947652
chao	T6_D32 vs T5_D10	n/a	1
chao	T5_D32 vs T5_D21	n/a	0.947652
chao	T6_D10 vs T5_D21	n/a	0.799078
chao	T6_D21 vs T5_D21	n/a	0.443478
chao	T6_D32 vs T5_D21	n/a	1
chao	T6_D10 vs T5_D32	n/a	0.799078
chao	T6_D21 vs T5_D32	n/a	0.655714
chao	T6_D32 vs T5_D32	n/a	0.928445
chao	T6_D21 vs T6_D10	n/a	0.947652
chao	T6_D32 vs T6_D10	n/a	0.947652
chao	T6_D32 vs T6_D21	n/a	1

## Sheet: supp_TableS4_phyla
Sample	Time	Treatment	Med	Long	p__Acidobacteriota	p__Actinomycetota	p__Aquificota	p__Armatimonadota	p__Atribacterota	p__Bacillota	p__Bacteroidota	p__Balneolota	p__Bdellovibrionota	p__Caldisericota	p__Calditrichota	p__Campylobacterota	p__Candidatus Absconditabacteria	p__Candidatus Bipolaricaulota	p__Candidatus Cloacimonadota	p__Candidatus Korarchaeota	p__Candidatus Lokiarchaeota	p__Candidatus Micrarchaeota	p__Candidatus Omnitrophota	p__Candidatus Saccharibacteria	p__Candidatus Thermoplasmatota	p__Chlamydiota	p__Chlorobiota	p__Chloroflexota	p__Chrysiogenota	p__Coprothermobacterota	p__Cyanobacteriota	p__Deferribacterota	p__Deinococcota	p__Dictyoglomota	p__Elusimicrobiota	p__Euryarchaeota	p__Fibrobacterota	p__Fusobacteriota	p__Gemmatimonadota	p__Ignavibacteriota	p__Kiritimatiellota	p__Lentisphaerota	p__Mycoplasmatota	p__Myxococcota	p__Nitrososphaerota	p__Nitrospinota	p__Nitrospirota	p__Planctomycetota	p__Pseudomonadota
PN0536_0002_S2	D10	T1	T1_D10	T1_D10_1	24.091	22904	14.3009	0	0	885717	1959.9	0	3.07403	0	0	308.673	0	3.94278	0	0	0	0	0	0	2.70648	9.75671	14.9024	61.3804	0	0	382.249	0	64.2205	4.2435	0	171.511	0	97.6339	0	0	0	0	52.7931	37.8574	0	3.7423	6.11465	82.7315	32614.1
PN0536_0010_S7	D10	T1	T1_D10	T1_D10_2	21.5588	18678.2	0	43.4671	10.3133	1.2704e+06	2075.47	0	10.5463	0	0	207.547	0	0	0	0	0	0	0	0	27.6768	32.1051	6.0015	904.653	0	0	330.432	0	70.0369	16.4895	18.6454	352.806	0	74.1738	0	0	0	15.7903	153.883	37.9318	0	4.02042	0	113.854	23948.4
PN0536_0018_S11	D10	T1	T1_D10	T1_D10_3	30.6246	42953.6	21.9601	0	0	1.02068e+06	2398.28	0	0	0	0	147.745	0	0	0	0	0	0	0	0	0	8.36574	0	31.4711	0	0	150.036	0	53.4312	0	0	141.62	0	76.3872	0	0	0	0	522.709	616.973	6.97145	0	0	154.965	33964.4
PN0536_0023_S88	D10	T1	T1_D10	T1_D10_4	15.099	23641.5	10.6912	0	0	1.41313e+06	1463.62	0	3.65752	0	0	30.9013	0	0	0	0	0	0	0	0	11.5821	0	21.4293	835.602	0	0	88.5307	0	60.8649	0	0	890.278	4.314	44.5936	0	0	0	47.8291	12.2855	126.56	0	0	0	119.667	24726.5
PN0536_0026_S14	D21	T1	T1_D21	T1_D21_1	19.3886	31110.9	0	0	0	949260	2276.79	0	13.0018	0	0	331.241	0	0	0	0	0	0	0	7.18518	0	7.71742	4.86615	19.0464	0	0	230.496	5.43641	57.4814	5.47442	7.71742	118.574	11.7092	341.277	17.1076	0	0	4.48599	383.78	126.444	5.51244	0	11.5571	120.057	17799.5
PN0536_0034_S19	D21	T1	T1_D21	T1_D21_2	29.0304	50565.4	68.4426	0	0	1.10794e+06	3268.02	0	76.8633	0	13.2271	584.569	0	0	4.3065	0	0	0	0	0	0	0	3.69128	7.19031	19.187	0	2675.22	0	99.4724	0	0	249.2	0	282.229	0	0	0	0	45.795	51.2166	0	0	0	135.27	28242.1
PN0536_0042_S24	D21	T1	T1_D21	T1_D21_3	11.3388	25098.2	0	0	0	1.01251e+06	2265.33	0	0	0	0	650.584	0	0	0	0	0	0	0	5.11045	0	0	108.797	35.0944	3.39366	0	355.136	0	74.7802	15.0519	5.82911	169.084	0	259.395	0	0	0	0	1355.51	124.208	15.2116	0	0	42.1612	18616.1
PN0536_0047_S28	D21	T1	T1_D21	T1_D21_4	22.2348	42065	7.79256	0	0	1.02163e+06	1629.17	0	0	0	4.10408	528.907	0	0	0	22.5984	0	0	0	0	0	4.62359	5.19504	123.694	0	0	253.154	0	81.6141	0	0	147.955	0	353.938	13.1954	0	0	0	424.539	35.7419	0	0	14.65	82.0817	23723.1
PN0536_0050_S31	D32	T1	T1_D32	T1_D32_1	19.3965	37721.4	0	0	0	750221	24643.3	0	6.07784	0	0	571.467	0	0	16.2451	0	0	0	0	0	0	3.90182	11.8555	45.1711	0	0	433.14	9.56696	263.936	0	9.90462	179.671	0	413.781	4.72721	8.74158	0	0	580.996	150.483	4.20196	0	0	96.495	20225.6
PN0536_0058_S39	D32	T1	T1_D32	T1_D32_2	32.2995	43203	5.6683	6.69445	0	1.01008e+06	2163.43	0	3.76258	0	0	486.985	0	0	0	0	0	0	7.52515	0	0	15.148	67.2377	38.5542	8.20926	0	803.285	0	131.495	0	0	237.091	11.6786	494.803	4.49554	13.0957	11.4832	5.86375	197.266	125.045	8.30699	0	0	362.869	26973.7
PN0536_0066_S126	D32	T1	T1_D32	T1_D32_3	38.3584	33073.1	0	0	0	772508	1262.65	0	5.15262	0	0	459.06	0	0	0	0	0	0	3.18063	0	0	0	31.1384	86.5131	4.00759	0	576.075	0	228.878	0	0	278.496	3.75314	289.119	0	7.37906	0	2.22644	397.197	87.181	0	0	5.88416	157.855	21720.3
PN0536_0071_S44	D32	T1	T1_D32	T1_D32_4	33.227	37234.4	17.3622	0	0	722859	1599.43	0	8.3371	0	0	165.366	0	0	0	0	0	0	0	66.9801	3.96619	9.14653	10.8463	29.3822	0	0	627.67	17.7265	63.2972	0	0	138.088	0	192.725	0	0	0	0	132.382	63.4186	2.99488	0	0	158.162	24344.6
PN0536_0004_S3	D10	T2	T2_D10	T2_D10_1	68.5609	25960.3	4.40941	0	0	1.20406e+06	1054.17	6.18392	0	0	0	178.097	0	0	0	0	0	0	0	0	0	0	28.1234	14.465	0	0	263.059	0	135.509	0	0	297.366	0	21.5631	0	0	0	6.34524	34.6837	180.14	0	0	0	185.84	48725.1
PN0536_0012_S86	D10	T2	T2_D10	T2_D10_2	4.75504	39250.9	8.41947	0	0	649129	2258.77	0	3.44631	0	0	236.618	0	0	0	0	0	0	0	0	0	0	16.3591	54.443	5.97652	0	208	43.0135	138.769	9.64095	0	163.46	0	108.842	8.2886	0	5.27853	0	30.5806	73.4632	7.0235	0	13.4363	190.289	34871.5
PN0536_0015_S9	D10	T2	T2_D10	T2_D10_3	45.674	42543.6	2.41711	111.47	0	790637	2091.09	0	44.8265	0	0	377.384	0	0	0	0	0	0	0	0	2.1032	0	46.396	2.41711	3.82971	0	202.535	8.85229	145.215	0	0	137.367	0	363.289	15.7269	0	0	18.0185	133.946	185.207	0	0	76.8768	1742.58	40148.4
PN0536_0020_S120	D10	T2	T2_D10	T2_D10_4	0	19001.6	0	26.5093	0	1.42207e+06	1467.19	0	21.8518	0	0	163.188	0	0	4.4474	0	0	0	0	0	14.5679	0	3.11668	401.737	0	0	175.83	0	48.8864	0	0	677.056	0	30.3964	0	10.4006	0	0	5.32288	68.8822	4.86763	0	0	172.748	22219.9
PN0536_0028_S15	D21	T2	T2_D21	T2_D21_1	55.8614	36484.5	8.2878	0	0	988472	1502	0	5.76896	0	0	234.577	0	0	0	7.06901	0	0	0	4.10328	4.67205	14.8693	0	152.106	8.93783	0	293.933	25.9197	54.3176	0	0	202.726	0	213.005	0	0	3.29075	0	75.6059	149.952	5.80959	0	0	169.616	20187
PN0536_0036_S20	D21	T2	T2_D21	T2_D21_2	37.644	26124.8	3.91497	0	0	928255	1898.87	0	0	0	0	244.159	0	0	0	0	0	0	19.0102	9.97565	0	0	13.9283	33.0137	0	0	298.705	4.44199	39.7897	0	0	313.762	0	260.873	0	5.42073	6.58769	0	247.471	89.9314	2.22099	0	0	214.382	21584.1
PN0536_0039_S22	D21	T2	T2_D21	T2_D21_3	60.8045	28549.4	0	37.0096	0	904928	1725.47	0	18.1861	0	4.50404	236.292	0	0	0	0	3.90917	0	0	4.07913	42.4059	4.88646	28.0865	91.483	13.1722	0	358.538	8.92309	95.902	0	0	139.455	0	576.432	7.73335	0	0	0	319.149	132.954	0	0	16.444	175.19	18443.5
PN0536_0044_S25	D21	T2	T2_D21	T2_D21_4	58.3324	29503.9	0	13.2085	0	840894	2000.68	0	29.4822	0	0	396.319	4.29751	0	6.57266	0	0	0	0	13.7457	45.503	0	14.9149	37.382	12.0709	0	283.699	0	78.2084	17.1268	0	149.718	0	265.15	4.8347	13.5561	50.3377	8.34222	206.186	109.049	0	0	7.10985	145.957	17078.6
PN0536_0052_S33	D32	T2	T2_D32	T2_D32_1	28.7141	30447.4	3.51601	2.65654	0	779309	2676.85	0	6.99295	0	0	447.51	0	0	0	5.70375	0	0	0	3.28161	10.548	4.72708	19.5724	21.643	0	0	420.124	16.2908	168.651	0	0	207.054	0	229.595	0	11.8763	14.5719	29.4563	279.991	192.482	8.90722	0	8.98535	168.729	18101.1
PN0536_0060_S94	D32	T2	T2_D32	T2_D32_2	39.83	27805.1	0	0	0	838062	1648.77	0	3.47311	0	0	526.62	24.3118	0	4.10123	0	0	0	0	0	0	0	0	95.252	4.84019	0	321.669	6.17032	127.138	38.0934	0	178.089	0	327.433	3.99038	0	0	0	416.293	164.714	3.6209	0	0	86.717	55563.7
PN0536_0063_S42	D32	T2	T2_D32	T2_D32_3	28.0954	61477.8	16.3065	0	0	893735	2458.07	0	42.5518	0	0	179.113	0	0	4.04436	0	0	0	5.46418	0	8.04569	0	0	38.4214	5.93746	0	625.283	0	102.055	5.20603	16.9949	129.161	0	453.613	8.34686	0	0	0	193.097	56.8792	9.03527	6.84099	0	140.133	25669.7
PN0536_0068_S127	D32	T2	T2_D32	T2_D32_4	18.1823	31635.3	7.29518	0	0	753243	2840.83	0	3.22993	0	2.86795	462.353	0	0	10.6643	0	0	0	0	3.8425	4.64998	5.62453	30.4059	43.7711	5.68022	0	471.931	5.15118	198.334	0	0	143.787	3.45268	395.221	6.84967	0	6.12572	0	257.503	49.8968	19.0733	0	0	162.137	23376.1
PN0536_0006_S116	D10	T3	T3_D10	T3_D10_1	6.80188	21634	0	0	0	1.45204e+06	1486.68	3.77535	3.36974	0	0	81.4041	0	0	0	0	0	0	0	0	5.05461	7.05149	4.43058	0	0	0	614.322	0	13.8534	0	0	71.6381	0	61.4353	0	0	3.90016	0	169.392	87.1451	0	0	5.70983	67.894	53541.8
PN0536_0011_S85	D10	T3	T3_D10	T3_D10_2	29.329	42773.7	15.8711	0	0	1.1635e+06	1950.38	4.08379	0	0	0	179.176	0	0	0	0	0	0	0	0	0	0	3.4805	67.893	0	0	504.07	0	215.234	0	0	142.701	5.29036	84.8314	0	0	0	0	16.2888	93.5095	5.94006	0	0	163.166	38888.2
PN0536_0019_S119	D10	T3	T3_D10	T3_D10_3	73.3276	32933.7	15.8403	69.7635	0	1.2248e+06	1152.72	0	11.9463	0	0	1325.9	0	0	7.45816	0	0	0	0	0	0	41.1189	0	30.1627	0	0	604.507	0	129.825	0	0	215.693	6.40214	160.582	0	12.6063	0	0	48.049	72.7336	0	0	0	301.627	71342.1
PN0536_0035_S92	D21	T3	T3_D21	T3_D21_1	65.3174	73723.8	27.8049	0	3.63024	1.24777e+06	2026.62	0	57.4922	0	0	431.783	0	0	4.08738	0	0	0	8.41678	0	0	0	33.5058	52.3023	29.9293	0	174.736	4.11427	67.872	0	7.63695	247.394	4.57141	301.659	5.37813	0	0	0	127.085	573.228	0	0	2.52772	225.935	48049.7
PN0536_0041_S23	D21	T3	T3_D21	T3_D21_2	7.82877	26027.4	0	5.89839	0	1.11726e+06	2247.93	0	28.6876	0	0	497.503	0	0	0	0	0	0	0	0	0	4.61147	46.2756	268.323	9.27656	0	317.173	0	442.862	0	0	181.402	0	68.7967	0	6.70272	0	0	265.749	73.0328	0	0	40.1627	193.414	18140.2
PN0536_0043_S93	D21	T3	T3_D21	T3_D21_3	21.1442	29812.6	3.99134	0	0	768167	2775.7	0	12.4688	0	0	815.421	0	0	0	0	0	0	0	3.23266	8.9063	23.4862	11.974	69.898	0	0	441.027	6.69622	81.4102	6.36636	0	128.152	0	266.166	0	0	0	0	1276.31	110.999	0	7.32296	15.1077	215.631	19344.1
PN0536_0030_S91	D21	T3	T3_D21	T3_D21_4	20.9444	29180.8	29.3429	0	0	976679	1530.24	0	0	5.08058	10.6277	168.696	0	0	0	0	0	0	24.2624	0	0	0	57.5972	9.95379	4.97689	0	153.506	8.13929	220.02	0	0	143.967	0	372.697	7.10244	0	0	0	395.196	187.878	0	0	0	146.507	25274.7
PN0536_0054_S35	D32	T3	T3_D32	T3_D32_1	35.8013	37897.1	16.1808	3.79072	0	601317	1771.81	0	10.6	0	0	244.361	0	0	0	0	0	0	0	0	0	6.31787	18.2165	255.803	7.16025	5.0192	496.9	0	153.63	0	0	134.957	0	208.911	0	0	0	0	338.111	126.147	7.68674	0	12.6708	341.832	22405.7
PN0536_0059_S40	D32	T3	T3_D32	T3_D32_2	80.4505	30908.7	14.2601	0	0	745558	2163.89	0	12.3983	0	0	249.987	0	0	0	0	0	0	9.50671	0	0	4.79297	47.0978	294.114	4.67413	3.48579	370.96	3.05007	128.776	8.71448	25.9058	116.536	0	481.673	7.13003	0	0	0	418.533	156.781	10.8535	0	0	195.799	23330.2
PN0536_0065_S95	D32	T3	T3_D32	T3_D32_3	33.0091	30575.1	0	0	0	1.01357e+06	3062.8	0	15.322	0	0	171.113	0	0	0	0	0	0	0	0	13.3682	0	3.65054	145.97	10.129	0	190.908	0	219.804	25.2453	0	139.081	0	294.717	0	10.6945	11.6715	74.3477	1110.02	135.636	23.3943	4.42178	0	111.059	19879.3
PN0536_0067_S96	D32	T3	T3_D32	T3_D32_4	71.7458	36446.9	0	0	0	814655	2476.29	0	0	0	0	616.094	0	0	0	0	0	0	5.93349	0	21.5089	0	22.3495	53.6981	17.4544	0	687.346	14.5371	301.372	7.0213	0	270.023	6.92241	111.401	0	0	0	0	375.738	136.322	0	0	0	292.472	26332.2
PN0536_0001_S1	D10	T4	T4_D10	T4_D10_1	10.1762	35885.6	5.42731	0	0	925730	1286.27	0	4.03279	0	0	110.807	0	0	6.93489	18.0156	0	0	0	0	0	0	21.6338	31.207	0	0	154.151	31.7347	67.5021	9.68623	0	138.359	0	163.95	0	0	0	0	74.927	82.7287	0	0	0	79.2613	20066.3
PN0536_0009_S84	D10	T4	T4_D10	T4_D10_2	23.7628	37378.6	0	18.7975	0	1.07324e+06	1596.6	0	7.84213	0	0	626.267	0	0	0	0	0	0	0	0	0	2.52209	14.1868	88.9826	0	0	415.633	0	39.8806	0	0	260.958	0	21.7136	5.75352	0	0	0	1813.82	64.7074	0	0	0	246.495	28136.2
PN0536_0013_S117	D10	T4	T4_D10	T4_D10_3	20.3338	27229.1	0	0	0	1.5835e+06	1482.06	0	0	0	0	171.167	0	0	0	0	0	0	0	17.9763	5.35358	6.43412	8.20228	55.6969	0	0	128.093	0	26.9644	0	0	261.147	0	498.866	0	0	0	0	20.0882	83.1033	0	0	22.7405	208.151	19753.5
PN0536_0024_S13	D10	T4	T4_D10	T4_D10_4	52.5287	37984.7	0	0	0	1.46625e+06	1520.55	0	5.75912	0	13.1438	92.471	0	4.50512	0	0	0	0	9.47468	0	0	23.0829	19.5531	10.4036	0	0	289.21	6.64156	82.2997	0	0	49.3705	0	47.5592	0	0	0	0	10.7751	109.377	0	0	12.3542	194.184	40091
PN0536_0025_S89	D21	T4	T4_D21	T4_D21_1	19.348	56661.7	0	0	0	828184	1898.99	0	0	0	0	270.609	0	0	0	0	0	0	0	229.943	13.1321	0	116.876	23.5502	0	4.55246	240.405	6.43473	101.73	0	0	99.2787	7.52907	238.917	4.8151	0	0	19.8732	179.735	109.653	0	0	9.19247	258.396	20697.6
PN0536_0033_S18	D21	T4	T4_D21	T4_D21_2	15.1966	53896.4	10.0769	0	8.81728	764724	1870.85	0	7.84209	0	0	259.602	0	0	0	0	0	0	0	95.1209	7.7202	10.727	22.7949	51.1971	0	0	288.654	0	153.266	0	0	271.548	0	158.264	0	0	4.42895	8.89854	292.595	114.3	5.40414	0	31.856	76.6331	18426.6
PN0536_0037_S21	D21	T4	T4_D21	T4_D21_3	23.9504	57100.2	10.3478	0	4.51373	746871	2108.59	0	2.11869	0	0	178.062	0	0	0	0	0	0	2.48716	6.04902	2.54857	11.6375	249.146	20.1736	4.42162	0	537.257	17.0724	133.478	0	0	207.202	0	352.071	8.29053	3.62327	0	0	283.26	99.3329	5.46561	0	15.0765	100.807	19062.6
PN0536_0048_S29	D21	T4	T4_D21	T4_D21_4	52.4845	70615.6	0	0	7.95555	868409	1712.05	0	0	0	0	119.389	0	0	0	0	0	0	0	121.488	0	6.18765	14.3089	74.4176	3.70154	0	473.19	11.2704	254.522	5.19321	0	184.469	0	184.027	6.02191	5.24845	4.80648	0	278.113	382.474	0	0	0	69.3348	30764.8
PN0536_0049_S30	D32	T4	T4_D32	T4_D32_1	52.9403	44603.6	0	0	0	769484	2067.51	0	3.1361	0	0	183.947	0	0	0	0	0	0	0	30.913	0	8.6616	131.492	274.819	4.92815	0	375.958	30.0169	183.835	4.14413	0	133.919	0	419.752	9.7443	0	2.42674	0	364.123	178.347	2.98676	0	16.6885	142.842	23195.6
PN0536_0057_S38	D32	T4	T4_D32	T4_D32_2	30.7814	77861.6	3.25701	29.847	0	1.31156e+06	1425.72	0	22.2918	0	0	170.085	0	0	0	0	2.16244	0	3.12352	2.02896	0	4.21809	12.4674	92.9849	2.64298	0	192.751	16.3651	114.876	0	0	62.8442	4.29818	359.926	0	0	0	50.804	125.101	525.686	12.0403	0	7.58189	52.0053	28987.2
PN0536_0061_S41	D32	T4	T4_D32	T4_D32_3	25.3302	67851.5	20.4347	4.22788	0	905599	2607.04	0	3.37489	0	0	320.762	0	0	0	0	0	0	0	0	0	15.7618	24.5885	43.3914	6.56434	0	364.451	5.04379	173.454	5.52591	0	83.3337	6.52725	229.381	15.7247	0	0	0	496.553	85.8185	0	0	0	113.634	18410.2
PN0536_0072_S45	D32	T4	T4_D32	T4_D32_4	15.0258	35330.2	2.95589	0	0	669672	1751.86	0	8.79729	0	0	148.076	0	0	2.81513	0	0	0	0	7.4601	0	3.906	28.4328	139.314	0	0	476.672	10.6975	67.2113	0	0	186.432	0	370.049	8.37502	0	0	0	174.257	155.501	10.6271	0	15.0961	110.459	21179.5
PN0536_0005_S4	D10	T5	T5_D10	T5_D10_1	9.34233	55876	8.20573	5.43352	0	700136	2402.17	0	15.6352	0	0	527.468	0	0	0	0	0	0	5.82163	0	0	8.17801	0	4.21375	0	0	289.529	14.36	172.847	3.54842	0	207.583	0	339.983	88.7106	14.0274	0	0	662.89	88.5997	3.29893	0	5.76619	355.591	26146.7
PN0536_0007_S5	D10	T5	T5_D10	T5_D10_2	32.0746	42767.2	5.80961	0	0	768443	2793.87	0	6.26185	0	6.43579	71.5243	0	0	0	0	0	0	0	11.3409	0	26.4737	112.992	10.1929	0	0	305.474	0	178.602	0	4.00063	206.05	0	280.914	0	4.27893	0	0	668.349	30.4396	4.55724	0	0	219.652	24814.7
PN0536_0014_S8	D10	T5	T5_D10	T5_D10_3	13.1953	38865.4	4.28528	0	0	854414	1886.96	0	0	0	0	544.824	0	0	0	0	0	0	0	3.30942	9.16455	0	39.0766	29.8272	9.58884	0	239.594	7.34013	50.0656	0	0	128.473	0	263.905	0	4.15799	0	12.0073	467.732	464.337	0	0	11.1163	145.021	16591.1
PN0536_0022_S87	D10	T5	T5_D10	T5_D10_4	82.1607	41762.1	23.6597	4.78056	0	811854	1994.63	0	0	0	0	115.179	0	0	0	0	0	0	0	59.838	0	57.2857	0	64.0514	0	0	587.158	0	218.245	0	5.55031	153.626	0	48.0081	0	0	0	0	59.0277	135.152	5.30723	0	47.7651	110.236	25783.8
PN0536_0029_S121	D21	T5	T5_D21	T5_D21_1	35.9679	39206.9	14.4783	3.78609	0	842567	1829.03	0	2.80451	0	0	304.745	0	0	0	9.14972	0	0	4.55733	0	0	12.8657	121.541	55.5293	4.06654	0	436.522	8.37848	92.4087	3.36541	4.03149	145.344	0	592.313	5.2234	10.5169	0	0	505.163	233.756	0	0	0	110.918	20027.2
PN0536_0031_S16	D21	T5	T5_D21	T5_D21_2	24.9129	79736.2	26.2911	0	0	835706	1848.86	0	0	0	0	366.626	0	0	0	0	0	0	0	0	11.0606	0	57.8475	7.77425	16.856	0	532.041	0	228.457	21.8739	4.48786	268.706	0	329.981	3.21571	0	0	0	82.1243	94.1037	5.54798	0	6.74946	244.641	20398.1
PN0536_0038_S122	D21	T5	T5_D21	T5_D21_3	76.8124	55577.7	0	8.16383	0	1.08123e+06	1552.62	0	0	0	0	282.436	0	0	0	0	3.7803	0	0	56.9055	0	0	241.255	47.6961	0	0	179.846	0	99.1323	0	9.8529	95.9552	0	305.641	12.2659	0	0	0	170.837	64.9487	5.91174	0	17.8961	37.9638	21170.3
PN0536_0046_S27	D21	T5	T5_D21	T5_D21_4	25.1951	52784.1	12.4997	0	3.69119	759206	2458.67	0	15.8833	0	0	477.841	0	0	0	0	0	0	0	0	9.95502	12.9471	37.555	81.0663	6.48754	0	401.137	7.01885	62.8341	0	103.157	167.25	0	466.152	0	0	0	0	414.559	118.537	5.42493	0	0	110.288	14611.8
PN0536_0053_S34	D32	T5	T5_D32	T5_D32_1	44.3403	33993.1	0	0	0	813357	1853.07	0	32.5142	0	0	509.006	0	0	0	0	0	0	0	22.9868	0	19.6598	11.2514	18.5709	0	0	1363.69	46.1248	130.813	30.4878	0	162.511	0	144.998	3.81097	0	2.02647	0	240.515	117.112	9.3762	0	0	89.8905	20122.6
PN0536_0055_S36	D32	T5	T5_D32	T5_D32_2	42.041	39615.8	5.73286	0	0	642449	1673.26	0	14.1957	0	0	444.024	0	0	0	0	0	0	0	0	3.00293	4.0676	5.18687	66.9107	5.62366	0	642.927	0	75.9741	0	0	117.578	2.10205	399.853	3.68541	0	0	9.30907	342.607	108.897	0	0	6.11505	214.682	18768.2
PN0536_0062_S124	D32	T5	T5_D32	T5_D32_3	0	39418.2	0	0	0	758905	2170.26	6.86503	5.52358	7.53575	0	483.787	0	0	2.52507	0	0	0	0	0	8.83774	3.55088	3.2747	46.3192	0	0	1028.61	32.2735	159.987	0	0	116.35	0	139.392	0	0	2.4067	0	293.736	160.184	0	3.66924	0	64.1919	17725.1
PN0536_0070_S43	D32	T5	T5_D32	T5_D32_4	18.5695	44996.4	10.0734	0	0	911591	3880.44	0	14.1601	0	6.45271	122.35	0	0	0	0	0	0	0	0	5.5565	4.19426	10.1451	94.1378	0	0	408.564	0	151.89	0	0	208.96	0	98.8698	4.58859	0	0	0	72.0911	132.424	9.42812	0	6.16592	326.722	24588.9
PN0536_0003_S83	D10	T6	T6_D10	T6_D10_1	44.2074	47361	214.94	0	0	763612	2149.92	0	23.8662	0	0	243.14	0	0	0	0	0	0	0	0	0	87.4901	10.9796	69.5471	6.03878	0	158.02	0	124.532	0	0	26.1199	0	263.106	3.40946	0	0	0	91.9975	143.804	0	0	7.88798	447.217	24336.9
PN0536_0008_S6	D10	T6	T6_D10	T6_D10_2	41.8527	29341.3	0	0	0	724115	2546.92	0	19.9113	0	0	434.3	0	0	0	0	0	0	0	2.31647	0	73.1381	9.44809	7.78231	6.61106	0	283.937	3.2795	144.298	0	4.89323	124.517	3.09731	315.951	5.622	0	0	0	947.516	110.228	0	0	33.0293	168.4	24709.3
PN0536_0016_S118	D10	T6	T6_D10	T6_D10_3	53.7454	35709.2	0	13.5823	0	1.39257e+06	1436.69	0	57.0534	0	12.9207	189.724	0	0	0	0	3.11342	7.70572	0	0	77.135	0	21.9885	74.7999	0	6.26576	253.394	0	148.082	0	0	168.242	0	252.187	6.65494	0	0	0	793.066	221.131	0	0	0	203.929	32556.7
PN0536_0021_S12	D10	T6	T6_D10	T6_D10_4	13.9268	93257.1	439.859	5.08058	0	765279	1709.38	0	17.6625	0	5.28978	109.83	0	0	0	0	0	0	10.6095	25.7018	3.40698	6.42544	0	104.75	0	0	218.286	0	68.827	4.54264	0	822.188	0	100.267	0	0	0	0	254.537	105.676	14.8233	0	0	107.32	37206.8
PN0536_0027_S90	D21	T6	T6_D21	T6_D21_1	0	46313.5	4.20035	0	0	756016	2376.52	0	30.552	0	0	334.613	0	0	0	0	0	0	0	5.34992	70.787	0	154.087	173.32	6.54371	0	483.925	0	93.5573	9.72713	0	139.098	0	385.239	0	0	0	0	271.033	117.3	4.24457	0	3.66978	65.5255	16048.4
PN0536_0032_S17	D21	T6	T6_D21	T6_D21_2	19.9177	67233	0	20.5612	5.2399	1.08244e+06	1706.61	0	0	0	3.06427	155.879	0	0	0	0	0	0	0	6.80267	0	6.80267	0	24.7899	14.9536	0	275.999	4.87219	31.8684	11.0927	0	121.743	0	159.25	0	0	3.18684	42.6546	116.565	87.4849	0	0	12.6248	117.729	17359.2
PN0536_0040_S123	D21	T6	T6_D21	T6_D21_3	2.15967	95002.1	3.40423	32.5415	0	750692	2545.85	0	15.3007	0	5.45409	260.295	4.39255	0	0	0	0	0	0	4.02651	6.25939	31.0773	5.67372	187.745	10.0297	0	1231.75	3.51404	327.209	0	0	435.119	0	114.975	0	0	15.3739	0	206.194	228.486	8.45567	0	9.70022	193.602	40559.2
PN0536_0045_S26	D21	T6	T6_D21	T6_D21_4	52.8266	61385.5	0	6.8029	0	699191	2225.07	0	0	0	6.87231	295.44	0	3.57499	8.85071	0	0	0	0	4.37329	13.9529	2.95024	2.42961	52.3059	30.7866	0	2829.62	4.68567	289.713	8.26066	0	155.703	0	197.353	12.3216	0	0	0	362.219	126.478	0	0	3.1932	198.117	31749.5
PN0536_0051_S32	D32	T6	T6_D32	T6_D32_1	11.366	39395.5	0	0	0	600630	1695.38	0	0	0	2.45576	462.465	0	0	0	0	0	0	3.06426	0	0	7.41073	14.778	92.1452	7.97578	0	401.223	6.88916	172.598	0	0	49.7019	0	416.348	1.91245	0	0	0	474.765	69.7826	7.17168	0	0	128.047	22950.4
PN0536_0056_S37	D32	T6	T6_D32	T6_D32_2	3.76412	41677.2	18.4066	3.61356	0	672109	2917.68	0	30.0753	0	0	546.362	0	0	0	0	0	0	0	0	4.74279	23.187	14.9059	56.1983	7.90466	0	602.184	21.6061	97.1896	0	0	151.581	0	567.291	18.6324	3.87705	0	5.72147	773.602	79.2348	4.96864	0	0	211.92	20942.7
PN0536_0064_S125	D32	T6	T6_D32	T6_D32_3	46.9683	55529.9	0	0	0	1.35919e+06	1672.4	23.6029	0	0	0	109.857	0	0	0	0	0	0	0	0	0	22.9693	0	46.2554	0	0	237.93	9.42534	353.886	0	0	136.39	0	12.1183	0	0	0	0	128.628	137.895	0	0	0	402.834	52649.1
PN0536_0069_S128	D32	T6	T6_D32	T6_D32_4	4.26391	60350.3	6.76812	0	0	1.09925e+06	1836.46	0	0	0	0	391.739	0	0	0	0	0	0	0	4.53464	0	0	0	90.6251	0	0	405.004	0	114.72	0	0	64.2971	10.2199	615.289	0	0	0	0	23.35	196.681	0	0	0	110.523	15965.3
[truncated: 9 more columns]

## Sheet: supp_TableS5_genus
Sample	Time	Treatment	Med	Long	g__Wansuia	g__Mediterraneibacter	g__Eubacterium	g__unknown_f__Lachnospiraceae	g__Faecalibacterium	g__Blautia	g__Ruminococcus	g__Massilistercora	g__Paenibacillus	g__Caproicibacterium	g__Lachnoclostridium	g__Caproicibacter	g__Acutalibacter	g__Sellimonas	g__Staphylococcus	g__Qiania	g__Clostridium	g__Anaerotruncus	g__Marvinbryantia	g__Caproiciproducens	g__Lactobacillus	g__Flintibacter	g__Enterococcus	g__Subdoligranulum	g__Parasphingorhabdus	g__unknown_d__Bacteria	g__Roseburia	g__Pseudomonas	g__unknown_f__Oscillospiraceae	g__Dysosmobacter	g__Enterocloster	g__Flavonifractor	g__Vescimonas	g__Leuconostoc	g__Bacillus	g__Coprococcus	g__unknown_o__Bacillales	g__Pusillibacter	g__Intestinimonas	g__unknown_o__Eubacteriales	g__Streptococcus	g__Limosilactobacillus	g__Oscillibacter	g__Brevibacillus	g__Anaerocolumna
PN0536_0002_S2	D10	T1	T1_D10	T1_D10_1	14848.2	91123.5	14009.6	10486.3	53490	157209	7863.07	16323	4907.62	1916.36	87766.1	730.517	78186.6	4543.85	649.289	1142.4	41303.4	4008.9	15747.7	1390.97	18849.9	9081.66	1798.88	11709.7	0	16610.6	11371.1	2915.99	8399.72	26533.9	25932.4	34020.5	3696.72	8.35334	851.339	4059.69	257.584	1713.61	6508.06	10358.8	865.34	605.484	2558.06	118.952	981.451
PN0536_0010_S7	D10	T1	T1_D10	T1_D10_2	3754.2	31228.7	12895.6	5967.18	183121	187914	3400.52	17373.9	2756.61	1203.56	46294.9	1446.42	11024.6	15709.3	951.732	1630.66	127503	19084.4	13960.2	946.838	65612.4	18270.9	2917.08	152272	0	13661.6	10161.6	3195.77	2021.98	19241	16328.3	109251	4928.57	4.66136	12805.4	3297.21	836.83	3871.78	6677.63	8680.79	1399.81	16321.9	16972.1	44.9821	544.213
PN0536_0018_S11	D10	T1	T1_D10	T1_D10_3	4591.79	114479	17321.7	11495.9	110746	148240	5468.95	21690.4	5099.02	455.385	64057.4	1653.73	23047.1	13135.6	332.787	1142.02	18682.5	3245.11	17523.6	600.092	51971.3	6427.97	967.637	72791.9	0	13988.1	13816.4	2381.55	7540.72	21878.1	22443.6	46575.1	4817.12	79.8729	1172.95	4143.03	266.16	2587.55	4246.26	13724.5	608.408	9441.28	3892.71	106.165	638.884
PN0536_0023_S88	D10	T1	T1_D10	T1_D10_4	1442	259442	33095.9	22507	64265.3	259715	6108.29	64283.1	4592.11	947.204	161687	598.989	28532.3	29229.7	22.2734	448.937	39903.4	3471.41	17040.8	1434.17	35423.6	6948.54	19661.2	20374.6	0	9866.44	15933.9	1891.55	3733.72	11036.3	49685.1	34374.8	5800.73	0	896.983	14146.3	619.715	2085.07	5281.36	7956.56	1526.87	9315.84	3435.02	202.008	326.223
PN0536_0026_S14	D21	T1	T1_D21	T1_D21_1	46272	45792.7	20002.9	8121.88	160877	238579	15259.4	20823.5	3049.67	4512.33	66055.5	1137.73	13596.3	11563.1	2085.3	3258	38719	2451.06	9244.67	1336.03	1854.12	5486.89	2001.4	21197.4	0	16982	11611.1	2052.72	3708.24	8280.29	13339.2	26412	6497.76	315.92	3889.12	4349.73	1574.43	2205.62	2416.27	8613.55	1157.16	923.657	2890.38	507.487	628.456
PN0536_0034_S19	D21	T1	T1_D21	T1_D21_2	8645.41	152984	19551.5	14108	68017.9	227285	12950.6	28288.5	11139.8	720.992	88718.7	263.619	30666.4	21233.4	405.118	1299.68	52887.3	4604.49	12184.1	2075.42	23314.2	3989.78	4699.97	60681.8	0	13357	16230.4	4992.42	2364	9092.94	32864.2	21027.3	3431.63	11.3046	4949.4	3501.41	886.793	3154.59	4091.44	10775.1	2109.84	6443.94	2665.61	175.528	417.269
PN0536_0042_S24	D21	T1	T1_D21	T1_D21_3	3920.31	27741.1	10143.9	7181.46	284120	187603	13562.1	16085.2	4286.63	1573.7	51611.1	962.521	3534.35	11999.5	2642.78	849.932	67737.6	2559.3	4403.45	1581.48	23404.3	7243.14	1768.22	26549.7	23.6758	14022.2	6978.64	1660.26	5936.19	8921.21	15856.7	26271.2	15242.2	54.8575	6840.82	4852.05	1919.57	2357.59	3189.96	8353.67	3730.03	8703.49	6204.64	121.014	762.615
PN0536_0047_S28	D21	T1	T1_D21	T1_D21_4	11823.4	16413.4	7661.86	9550.2	313947	93879.1	18063	9997.5	3702.4	664.446	35186.5	149.617	27987.3	9589.17	1130.03	615.768	25549.2	1579.92	11554.6	1025.66	82908.2	3447.38	1132.99	74136.3	0	11605.8	7017.62	2288.42	2041.34	4809.57	9700.5	22562.7	3812.12	44.2618	1863.36	3149.86	680.499	2392.89	3334.8	7107.18	1064.78	22131.1	2645.06	177.878	572.234
PN0536_0050_S31	D32	T1	T1_D32	T1_D32_1	36591	14577.1	10867.3	5966.07	169132	155257	12470	17165.9	4250.92	405.639	38273	342.422	5907.43	13453.2	2376.1	1114.61	41990	1630.74	11497.5	980.22	4383.24	5684.01	1504.23	17363.5	11.9306	14756.3	6125.6	2128.29	2111.03	3472.36	16636	30161.1	3905.72	146.056	5140.57	3720.5	2034.84	2861.08	2983.54	5919.29	6211.44	452.161	2733.34	117.092	1204.31
PN0536_0058_S39	D32	T1	T1_D32	T1_D32_2	15418.9	19903.7	8557.56	8275.71	197025	148344	27866	19630.9	2556.35	1489.3	30349.4	1107.91	48166.3	12028.6	542.446	770.595	64229.3	5897.91	13051.4	2196.95	63706	19336.6	1180.81	42520.4	0	16148.4	13832.4	4968.46	3759.5	13888.2	15751.3	34835.7	13963.9	0	1105.17	4840.28	947.583	4003.33	4754.28	4598.4	848.974	18088.4	4974.81	404.892	820.241
PN0536_0066_S126	D32	T1	T1_D32	T1_D32_3	2369.12	22073.4	11011.3	8220.59	154472	117594	8522.84	9944.46	5786.01	863.604	33077.3	295.957	8686.58	5080.1	2288.3	369.78	72928	5958.46	7631.22	506.388	36054.6	6019.4	756.608	89033.9	0	12350.2	3323.92	2563.68	2054.91	4912.86	10698.7	22035.8	8551.06	24.7453	7510.26	2720.46	835.551	3984.18	5028.1	6255.95	4578.83	7709.56	5241.71	130.342	2554.39
PN0536_0071_S44	D32	T1	T1_D32	T1_D32_4	2246.57	2840.2	6166.91	5769.23	244588	88910.7	4967.25	10143.2	7593.36	2358.06	22204.7	1209.16	4581.44	1924.41	1195.73	760.74	29786.2	5956.86	11018.9	1779.97	18812	7714.85	593.917	46013.5	0	12948.4	3712.36	2287.97	1944.89	13775.2	14249.2	30492.4	8932.07	4.08761	5072.36	3058.22	2875.29	3359.93	4316.15	10384.7	983.899	12336.2	6923.07	95.8362	496.26
PN0536_0004_S3	D10	T2	T2_D10	T2_D10_1	873.546	58410.6	39780.2	5144.54	38386.3	292226	2775.94	58857.9	8673.68	1398.8	43644.5	989.535	68269.7	16165.7	27.3168	613.768	53623.6	5007.96	13218	1907.93	59131.7	14290	2240.3	20728.3	0	13526.7	3254.52	3114.98	72606.5	32876.7	24284.5	97794.6	17971.1	47.9657	4224.59	2727.06	284.514	4694.78	22276.7	7296.97	4469.58	25439	4596.59	73.1854	183.259
PN0536_0012_S86	D10	T2	T2_D10	T2_D10_2	1089.03	48124.3	13290.1	5968.84	75227.7	63734.3	2841.68	9846.51	9467.11	1477.38	36745	565.064	34136.1	3667.53	900.665	174.54	49281.7	2137.06	9271.15	2849.18	7305.61	7116.59	1874.92	51631.7	0	16031.2	4725.68	3210.52	3529.55	31505.5	10315.3	44717.1	4038.55	25.0839	1167.65	6363.29	269.728	9944.97	4974.9	6235.21	13567.5	165.336	5731.65	110.631	315.316
PN0536_0015_S9	D10	T2	T2_D10	T2_D10_3	3877.49	13121.8	7575.42	7080.07	65701.2	80527.5	3038.72	8386.82	4233.97	1924.46	22384.3	591.785	68621.7	21925.3	4463.03	1561.68	50932	9658.91	9751.49	2425.46	12049.8	15090.7	11334.7	85032.4	26.9963	17283.9	6283.71	9336.28	5618.44	28182.8	13684.8	50693.1	17568	0	10449.6	2039.13	1035.34	3012.29	6508.63	7223.59	4814.83	16969	8683.87	159.53	708.811
PN0536_0020_S120	D10	T2	T2_D10	T2_D10_4	3069.93	48017.7	25428.5	7956.51	101996	477485	2621.48	21517.5	8563.53	1708.82	107661	289.782	35430.3	17620.9	78.6875	534.494	44283.3	12596.3	17098.5	5105.76	28004.9	13926.5	5571.9	49459.4	0	12039	6879.36	1823.12	5032.36	11840.4	43188.9	101068	6204.55	0	68250.4	11768.3	162.488	4420.61	13248.6	13725.5	906.01	8885.53	8301.48	216.662	759.14
PN0536_0028_S15	D21	T2	T2_D21	T2_D21_1	2508.04	30687.2	10971.8	11811.5	164054	165167	13354.3	21618.5	4862.79	2313.56	42795.4	2504.38	31282	18441.6	155.234	678.219	35721.7	7318.7	11454.3	1347.95	43450.9	8851.66	1965.71	134501	0	15901.4	8369.54	2468.42	2412.44	13488.9	24188.4	32061.1	4650.11	0	1040.32	5467.39	524.529	4243.52	4580.43	7411.69	1842.13	8402.37	8343.83	284.751	1166.59
PN0536_0036_S20	D21	T2	T2_D21	T2_D21_2	3724.12	13737.8	17045.3	10739.6	155213	212680	11910.6	15956.2	4533.12	1434.95	54290.4	414.196	19737.7	24712.9	1578.37	961.314	26544.7	4072.55	11775.1	820.412	10089.5	10746	2711.68	80731.3	0	13181.9	6463.73	2817.12	2663.99	7397.71	16386.2	33651	4671.09	21.043	7542.53	5537.54	1690.7	2483.3	3746.82	7084.25	14682	63.5806	5564.94	48.9371	1154.39
PN0536_0039_S22	D21	T2	T2_D21	T2_D21_3	5359.81	33817.7	12738.8	8111.39	164064	172653	15140	19299.7	5294.71	682.574	50676	680.705	20275.4	9629.08	625.934	1025.43	61421.7	2692.65	12919.7	736.028	30532	6769.95	1630.63	37560.5	0	13674.6	8206.48	1863.23	2828.71	13841.8	21345.6	27691.4	2736.97	45.2528	7903.52	3313.23	1474.86	3648.06	9225.59	5032.2	1760.53	2936.12	4118.6	107.162	1719.31
PN0536_0044_S25	D21	T2	T2_D21	T2_D21_4	4013.78	33030.2	8744.74	7356.29	73907.3	103390	13554.7	14259.8	3465.53	1225.04	35231.8	307.082	5413.38	17546.6	1335.04	913.821	30138.3	4976.07	4745.56	867.339	164731	14187.8	1530.83	31641.6	0	11807.1	4199.58	2067.51	1379.22	5362.12	12742.1	33814.1	3786.64	273.176	3055.09	3197.19	910.724	1183.11	5733.54	5491.08	1274.37	93047.1	3381.51	269.226	1048.12
PN0536_0052_S33	D32	T2	T2_D32	T2_D32_1	2662.16	31099.7	8998.28	7142.93	117546	98773.9	15628.9	16011.8	4517.05	2093.78	27998.4	1617.25	10889.7	14335.2	528.964	1512.78	26881.7	11626.2	7365.92	299.798	45006	7061.08	1566.85	104199	0	13966.9	9523.03	1855.55	2741.39	30273.8	20550	23751.9	2798.66	96.8855	1674.99	3084.71	298.548	2836.87	7035.02	7883.24	1202.51	18711.3	2343.18	180.684	1004.21
PN0536_0060_S94	D32	T2	T2_D32	T2_D32_2	1545.24	20479.1	11015.8	5422.05	115196	251836	9220.93	16470.1	4987.65	1527.54	42073.1	149.233	9235.71	25701	1795.75	1658.45	57836.7	1665.87	8234.27	666.136	39970.2	11458.1	4778.19	16777	0	13215	10496.6	3006.24	1487.9	4584.07	13043.5	29669.6	4460.59	57.9714	1812.52	3479.32	1035.8	2117.75	3356.5	5509.17	582.227	7739.5	2140.95	39.9038	2758.94
PN0536_0063_S42	D32	T2	T2_D32	T2_D32_3	3153.65	16049.8	5671.22	7976.85	165217	116132	6572.64	11796.7	8887.6	1255.3	30716.5	1373.23	12529.9	14058.3	830.642	822.295	45506.7	3954.56	6218.16	1588.18	13749.2	10598.2	636.857	21536.9	0	15472.1	7013.99	2836.51	3111.32	22034.3	11128.9	27911	6738.07	13.682	1966.68	7821.4	511.955	4473.75	8369.24	6869	22698.9	10078.8	7339.05	72.5833	1444.7
PN0536_0068_S127	D32	T2	T2_D32	T2_D32_4	31597.7	32502.2	8466.36	6998.53	100670	101373	7770.95	14440.6	4899.33	1221.14	41962.4	555.687	11314.4	16373.1	1710.97	875.004	54836.8	2278.96	4680.86	339.226	35300.2	9245.92	1693.82	23449.6	0	14753.8	6951.25	2989.63	2508.51	8047.34	14322.5	33622.8	11024	4.3437	4594.82	2523.97	1257.81	3861.38	5161.01	8181.99	9371.33	18906.4	5436.89	107.005	1534.16
PN0536_0006_S116	D10	T3	T3_D10	T3_D10_1	3033.08	109500	24073.3	11973.2	75022	170698	4765	30999.4	4610.08	731.264	149432	483.339	42894.9	43952.4	18.0343	784.4	59393.5	3226.68	31521.9	4728.86	147603	8508.21	3806.21	25521.2	0	10854.8	17658.6	2148.86	6563.37	46107.4	91956.2	72896.9	10228.6	26.3651	1023.71	5128.93	237.036	5557.57	10109.1	19088.2	2856.41	13846.5	8815.86	111.389	2218.47
PN0536_0011_S85	D10	T3	T3_D10	T3_D10_2	1499.86	85823.1	17789.8	17231.8	80013.8	232971	6688.27	30898.6	4690.28	1447.47	86596.8	1640.38	32188.9	7758.27	69.378	1805.96	61386.1	16527.3	29228.1	2059.81	10420.5	16909.3	8748.54	65828.4	0	14402.3	6624.65	2789	2454.54	48224.5	47395.5	62183	5479.15	3.01644	1072.78	11873.8	374.131	6592.54	6442.5	7110.16	15334.5	12051.1	6234.23	582.358	1468.31
PN0536_0019_S119	D10	T3	T3_D10	T3_D10_3	1370.78	55785.5	20795.1	7883.87	104863	306386	1814.25	106955	3401.58	1247.3	140373	505.637	19448.4	10904.5	89.3659	913.922	29365.9	5105.08	9236.37	3373.53	43410.9	21160.7	1989.15	43369.5	0	12271.6	5469.8	3556.29	2325.96	16857.8	38971	40786	3288.26	0	9066.02	1762.37	312.649	3108.87	4027.14	6014.45	349.742	4383.42	5015.19	92.534	468.61
PN0536_0035_S92	D21	T3	T3_D21	T3_D21_1	3992.97	105160	17377.8	13905.1	58563.1	178152	15045.2	30844.9	9240.87	1817.03	86777.7	1523.54	23506.8	46866.8	849.88	1056.96	33387.3	11904.4	23581.5	2020.05	5075.34	6519.35	2595.73	89542.4	0	15487.2	10897.3	4113.12	4573.89	38902.8	37023.5	85003.3	4220.68	0	3297.25	8787.25	599.205	5892.44	6735.36	11583.2	103888	20.5714	4453.52	334.117	667.668
PN0536_0041_S23	D21	T3	T3_D21	T3_D21_2	5933.41	56870.3	9620.81	8055.38	219523	137337	20377.8	16413.9	5778.49	1688.23	44069.6	476.054	28705.3	10985.7	1650.26	2077.9	24682.5	3242.18	8973.33	397.82	94583.6	12457.7	2665.75	150012	0	15318.9	6009.44	1848.93	2649.77	31880.7	24216.1	61380.7	7753.38	171.375	2952.9	4484.44	1013.72	4514.36	8169.59	7149.71	1136.24	2165.41	7721.64	63.649	1445.86
PN0536_0043_S93	D21	T3	T3_D21	T3_D21_3	3380.44	34858.8	8135.54	10115.5	39278	102628	20306.9	16993	4081.33	430.075	37841.4	1164.58	40958.6	11395.4	5238.55	1966.74	56759.4	10164.6	5871.73	900.031	5299.88	9754.08	1898.43	46781.6	0	14988.6	6063.97	1683.85	2874.06	23622.6	13610.6	48544.5	5213.68	6.89414	5986.35	3078.51	3778.35	3298.56	8717.72	7325.96	39955.5	325.278	5012.4	57.5611	752.912
PN0536_0030_S91	D21	T3	T3_D21	T3_D21_4	19074.8	20819.8	7215.67	6073.31	175628	102729	4992.19	13640.9	3410.11	955.615	32069	547.406	20398.7	22107.8	519.1	582.608	30554.8	2185.63	6354.46	422.725	3735	15500.4	1071.07	258771	0	16065.3	4264.94	2581.45	4677.45	7329.72	8809.52	30187.9	3342.97	72.8389	3083.86	3667.19	404.165	2840.3	2874.99	6900.26	30000.4	2826.88	8866.7	145.004	1259.72
PN0536_0054_S35	D32	T3	T3_D32	T3_D32_1	1315.87	20308.8	9034.94	8241.13	101389	87262.1	6883.77	9503.02	3853.79	683.172	29445.8	1082.6	4039.22	26662	1281.23	847.226	41918.6	2121.33	7681.48	797.28	19518.7	7460.39	900.437	20224.7	0	13273	5140.22	3420.21	2783.06	8757.44	16916.5	28531	7281.66	14.3907	3907.25	3220.04	941.433	2614.05	4860.41	7622.47	13327.6	7161.76	4100.89	83.9575	2470.88
PN0536_0059_S40	D32	T3	T3_D32	T3_D32_2	8295.32	16608.7	7027.91	6324.58	121264	69693.7	8699.67	10036.2	4232.03	801.851	19258.3	481.396	17146.8	15844.3	925.439	571.076	58904.6	5190.7	5276.78	546.081	34781.8	11898.5	1596.81	52657.7	4.99102	15453.4	6691.54	3385.89	2478.32	9679.1	10213.3	29266.7	7315.93	34.0261	2901.69	3328.18	597.18	2331.32	4567.34	5948.07	79309.9	24596.8	5568.04	167.437	831.599
PN0536_0065_S95	D32	T3	T3_D32	T3_D32_3	5231.23	26073.9	10459.4	8563.04	306315	173700	14026.1	16192.4	6505.99	3150.11	37511.3	154.814	12655.2	36105.6	717.254	781.987	25178.3	2044.92	8672.71	235.846	34988.9	10455.1	1519.45	36054.2	0	13285.6	8045.33	3384.41	3881.71	6666.3	10574.7	20591.5	6102.63	0	1218.77	4275.92	1418	5818.66	4613.51	9263.58	25147.9	20086.9	5731.76	33.6261	2400.62
PN0536_0067_S96	D32	T3	T3_D32	T3_D32_4	5594.74	19407	5529.22	7299.78	223573	104326	7330.38	11748.2	4184.45	847.797	23402	491.095	17130.4	23967.9	1213.2	550.628	51580.7	1995.38	5601.71	391.314	38578.2	8454.83	1657.17	49859.3	11.6692	14497.3	4657.1	3781.56	3412.8	6728.18	8941.97	32401.6	6025.71	20.8167	3392.03	3326.12	1660.64	2626.86	4292.44	6617.67	12765.3	20774.9	3990.72	135.778	765.717
PN0536_0001_S1	D10	T4	T4_D10	T4_D10_1	2086.12	96368.4	22005.4	13677.4	30039.1	236540	3932.8	17450.2	6528.26	2871.99	100027	450.466	15327.7	17275.3	43.2677	1441.78	43649	3671.57	25327.7	1400.43	44727.4	5293.85	1975.54	5754.15	0	12997.3	6289.68	2385.41	3290.87	17299.4	27895.7	31306.7	4820.88	3.54282	10869.9	3927.48	258.325	3897.63	6212.19	12131.3	1477.66	11578.6	5080.07	668.086	518.195
PN0536_0009_S84	D10	T4	T4_D10	T4_D10_2	4028.49	112981	18643.9	8507.81	35845.9	361349	3874.17	30268.7	12350.1	1070.31	116722	635.607	28153.8	12972.8	21.1619	600.691	21168.8	1858.43	24868.3	1315.9	1440.75	6132.11	2055.98	13001.3	0	13751	17494.1	2595.15	2796.17	7536.41	52664.6	31574.9	1822.96	35.6246	1512.51	8855.42	552.062	2994.87	3721.39	10589.4	8477.78	3440.09	1618.91	105.297	970.454
PN0536_0013_S117	D10	T4	T4_D10	T4_D10_3	6096.26	157533	25561.5	22982.8	93925.3	437986	4388.47	43682	9084.79	1053.48	163555	1180.1	37875.4	20196.1	77.7989	863.646	66194.5	25248.5	47369	1219.44	1170.08	10902.4	5986.68	24184.1	0	17833.7	25048	2769.03	3898.54	11800.2	73019.4	71745.1	3211.02	28.3396	1199.94	7032.55	496.999	4065.68	9437.73	12501.1	1175.73	5517.48	3301.34	87.8184	664.483
PN0536_0024_S13	D10	T4	T4_D10	T4_D10_4	5667.9	122726	22602.9	8485.18	63309.8	402026	1337.09	35578.8	14081.8	2696.61	145571	539.221	45176.4	5288.22	35.5765	1116.01	35280.1	4653.23	20892.5	3545.85	136592	5104.81	2182.57	20402.1	0	12082.7	13130.7	2295.94	2495.88	7336.93	29787.5	50353.4	34291.5	8.31357	1924.66	6030.73	304.583	4860.51	17015.5	9285.51	1755.69	49782.8	8511.93	32.3718	821.417
PN0536_0025_S89	D21	T4	T4_D21	T4_D21_1	5879.2	35300.6	9617.34	5215.15	288835	115327	2664.63	10692.2	6274.12	1985.92	32569.2	693.244	3049.36	11346.5	515.172	1440.02	31655	5598.96	6198.18	941.353	6997.22	8747.12	1783.73	39900.4	0	12801.6	6017.3	1769.77	4266.4	15528	9299.41	34814.6	17090.2	81.5504	1491.24	3404.85	531.325	5483.92	3993.3	8239.12	1373.75	674.377	9286.5	173.475	782.98
PN0536_0033_S18	D21	T4	T4_D21	T4_D21_2	3035.78	42802.6	10248	8321.72	139322	126263	5049.46	16421.1	4391.65	505.388	40281.1	978.596	5415.51	3379.94	433.184	1021.5	59088.9	4103.85	16167.7	633.991	6007.13	5917.12	1387.64	83016.4	0	11980.2	8610.74	1504.83	3370.56	8583.44	16068.4	33502.8	8010.15	0	3040.54	3301.52	881.159	1721.52	7429.92	7520.89	7416.91	33.5219	4743.78	115.762	634.681
PN0536_0037_S21	D21	T4	T4_D21	T4_D21_3	5514.37	38022.2	7170.05	7172.11	79232.7	66924.9	8535.23	8795.7	6836.4	1831.9	52926.1	192.555	11686.8	2627.88	1924.2	406.789	31668.7	2980.91	15125.7	776.025	94112	10349.6	985.591	31759.6	0	14466.1	4347.49	2727.25	5428.61	30718.8	31215.2	42439.8	23142.4	220.283	4049.4	2854.34	876.678	2287.67	4264.62	6566.23	2145.16	17822	9474.02	315.501	868.694
PN0536_0048_S29	D21	T4	T4_D21	T4_D21_4	4432.79	49054	8374.71	8478.91	207644	126628	3159.79	16363.9	5677.5	1180.02	35740.8	276.234	4138.77	3482.93	608.931	991.24	26277.5	9451.64	9774.44	590.81	107655	16523.3	4304.01	34512.7	0	17395.1	4257.93	3849.88	2961.62	7095.36	14855	34028.5	4887.64	0	2565.61	4683.67	164.47	3687.62	4913.77	4962.61	4288.71	11152.4	4281.3	52.8713	1915.08
PN0536_0049_S30	D32	T4	T4_D32	T4_D32_1	8126.97	33076.8	9197.13	8170.95	135612	114431	6910.73	12805.2	4618.87	663.285	36818	738.962	12467.7	11407.4	909.991	904.988	34414.3	1351.62	5218.76	253.875	21448.7	9850.74	1043.87	96878.8	0	15107.3	7594.4	3117.13	3892.61	9248.65	16864.9	35006.8	15991.6	95.5016	1224.42	2985.19	308.271	3198.86	4198.75	7322.15	606.835	15477.8	5954.67	100.43	1113.76
PN0536_0057_S38	D32	T4	T4_D32	T4_D32_2	7632.19	63285	15082.5	10867.8	170414	186150	4425.26	20825.7	4807.26	6878.75	78594.8	1378.14	3450.75	22827	327.676	1303.84	54764.2	36735.5	8277.39	3374.71	26988.3	13499.8	1770.37	114438	8.94342	12789.7	14912.4	4630.93	8605.18	34775.5	19550.5	151305	9448.58	9.47736	6803.14	8687.64	544.908	8926.95	12090.8	9170.61	3151.74	4595.93	9177.8	84.8424	3862.44
PN0536_0061_S41	D32	T4	T4_D32	T4_D32_3	5275.13	48338.5	8719.07	8373.2	99547.1	217961	7210.42	15534.5	3779.2	3889.17	53832.1	243.103	11780.5	13258.9	1469.74	1048.63	65002.5	2070.84	8075.88	344.461	62473.8	3919.1	1836.83	48076.3	0	14418.8	8175.16	1761.54	2429.36	2124.58	10227.2	15453.2	5286.29	40.6841	7274.66	4102.56	1175.31	1330.37	2181.1	8150.57	6932.94	18838.5	1461.1	101.988	1092.98
PN0536_0072_S45	D32	T4	T4_D32	T4_D32_4	7491.31	40213.9	11189.3	6988.43	138549	131911	2894.69	11319.5	3015.89	1777.54	34552.8	731.301	4503.37	9580.39	659.374	570.064	14993.2	10186.8	6387.36	1218.32	1821.57	9359.33	1773.32	54933.3	5.03205	12688.9	3543.58	2950.93	2547.06	5693.61	11173.2	28704.7	3906.84	12.0347	5105.91	3046.5	450.632	2557.13	7793.34	4981.27	10256	134.845	3607.24	104.864	649.24
PN0536_0005_S4	D10	T5	T5_D10	T5_D10_1	2243.1	54562.5	12120.6	5224.19	98848.1	72286.2	4231.83	10211.4	7779.06	6741.62	39193.8	303.279	25055.2	15322.6	1903.29	408.679	34878.2	3767.43	19815.6	1225.4	19224.4	11383.7	1745.1	55166.4	0	16484.5	5326.13	2239	2702.98	10662.5	32615.1	26744.8	2612.42	1.8851	5476.77	2448.72	3279.55	2291.95	4935.89	4859.79	1255.03	5029.84	3743.17	150.17	495.726
PN0536_0007_S5	D10	T5	T5_D10	T5_D10_2	2536.96	29180.5	10803.5	8573.87	39106.1	123095	3199.95	9979.52	6337.55	1116.84	45122.6	665.252	16420	36277.1	8418.12	1162.3	70485.1	3278.53	7718.71	407.577	51002.1	8732.19	17583	12124.3	0	15858.1	7371.7	2148.34	2693.95	11542.2	24562.9	22638.9	3815.07	44.5635	19575.9	2013.53	1939.09	1576.46	3375.49	5546.99	6352.72	6516.82	4205.67	53.4693	1482.91
PN0536_0014_S8	D10	T5	T5_D10	T5_D10_3	4777.11	80232.9	29296.7	9175.33	34245.9	132785	7371.86	14637.6	3563.53	515.548	60823.6	692.815	5920.77	23035.8	1480.03	755.821	33863.8	5243.69	14191.5	727.012	87301.8	10964.5	1742.41	6678.24	0	12490.6	7864.59	1714.32	2993.5	19861.3	32208.1	39698.6	7540.98	31.2274	3807.96	4869.26	1454.83	4545.58	6864.46	6869.21	1481.14	43627.8	7861.7	178.624	1061.05
PN0536_0022_S87	D10	T5	T5_D10	T5_D10_4	3423.28	93822.5	24799.8	10940.5	28550	200817	9779.15	22158.9	6436.09	781.135	62311.8	473.761	16979.9	14644.7	192.235	867.468	29814.7	7111.77	12802	1347.95	12936.2	10736.8	3381.03	27597.1	0	13638.1	7433.12	3000.89	1754.46	14786.7	28641	27784.4	3200.66	58.5821	3426.28	8510.32	368.994	3092.21	3462.05	7812.12	2100.57	4630.05	4052.78	140.864	600.122
PN0536_0029_S121	D21	T5	T5_D21	T5_D21_1	1277.74	64941.5	11728.9	9592.48	164128	172889	3903.56	21616.1	4503.55	490.86	53192	922.229	26579.4	6128.14	1346.06	900.844	30519.6	1906.79	8599.58	277.121	31974.1	7816.66	2144.57	17100.7	2.45395	16065.4	5712.72	3124.75	2792.98	9564.72	16555.8	30162.2	7998.22	153.547	4255.78	5615.09	557.362	1984.86	3470.86	7267.09	1622.27	7314.94	3523.76	159.752	447.775
PN0536_0031_S16	D21	T5	T5_D21	T5_D21_2	5605.9	65773.8	18094	9997.22	40809.1	211032	6734.58	22842.1	5687.81	756.681	57236.9	866.228	10563	24894.2	585.189	1392.47	55990.9	1768.25	8047.58	1301.44	46953.8	10218.1	1952.64	19968	0	12431.7	7305.67	2453.8	2716.85	11269.7	22979.4	30134.5	2282.06	77.6718	2915.02	3349.85	574.941	1740.97	3369.78	9126.54	1023.8	6795.47	2664.73	119.794	1549.09
PN0536_0038_S122	D21	T5	T5_D21	T5_D21_3	7726.28	92847	13431.6	9199.07	92616.3	140052	10425.3	20256.8	7132.78	542.473	84691.7	1297.77	22611.4	12153.2	1716.58	1619.29	53865.1	3495.25	16019.9	1033.07	77522	9863.68	2553.79	28198.9	0	11908.7	11229.7	2056.36	7422.85	23150.8	62770.9	83923.3	23446.3	3.09663	1912.07	5159.66	819.239	6006.13	6952.25	9614.38	1385.96	23263	10276.3	273.147	616.591
PN0536_0046_S27	D21	T5	T5_D21	T5_D21_4	3993.19	114852	10531.2	7072.54	27265.8	162836	2333.67	25383.6	6523.56	548.449	64682	458.826	5010.17	15978	1157.24	647.104	48844.5	2733.57	8040.75	397.558	6217.08	1998.33	1673.37	49766.4	0	8632.29	10163.7	1662.68	1695.48	14535.9	16984.5	21256.6	2315.46	22.7344	3222.21	5294.61	696.572	1788.07	5489.97	5635.57	2644.57	170.326	2538.47	36.5204	924.67
PN0536_0053_S34	D32	T5	T5_D32	T5_D32_1	5586.1	33992	9971.04	10800.8	198968	116914	3439.82	14993.8	7018.69	279.683	46332	179.327	35438.8	16345.3	1619.72	330.98	53590.6	4093.77	11147.2	796.795	18487.9	11435.8	486.504	13914.6	0	12023.1	6904.48	2011.44	1720.17	5875.22	20482.3	23381	5106.85	165.656	6664.24	2106.68	2249.74	1557.93	3377.88	9229.26	1195.37	4131.45	3640.87	61.7014	1763.12
PN0536_0055_S36	D32	T5	T5_D32	T5_D32_2	2462.13	31617.5	7023	6468.61	66618.2	93361.9	3787.65	13048.1	4919.2	553.085	34244	467.883	5740.97	10599.1	2757.64	933.883	33381	1025.25	6584	137.07	61957.7	6193.35	930.962	30873.6	0	12005.8	5215.59	2061.1	2291.12	5223.86	14181	22695.6	7475.57	9.50017	5218.3	4517.79	2636	1935.99	2674.84	6784.43	1703.04	42852.4	5835.48	99.4515	3298.99
PN0536_0062_S124	D32	T5	T5_D32	T5_D32_3	2078.6	39354.5	13055	11731	102803	72475.8	6190.75	11846.7	6267.69	905.907	33889.9	267.775	9585.98	18632.3	2191.28	1266.01	34625.4	3206.44	15176.3	418.056	47590.3	6386.76	1615.92	52725.7	14.9137	11864.1	5529.86	1664.93	3707.51	13309.8	24361.7	29861.5	4075.26	5.44468	4100.39	1936.57	2131.24	2925.92	5144.15	7643.26	2711.53	11405.8	4831.48	67.6245	671.984
PN0536_0070_S43	D32	T5	T5_D32	T5_D32_4	2488.49	38599	11913.4	6559.14	208901	208149	2932.5	21118.3	10798.1	856.848	34510	252.157	34541	32924.9	160.995	548.121	22502.3	2688.41	6744.83	286.07	6690.16	8608.09	1518.86	15030.1	0	17201.8	8854.83	2770.07	2152.66	5038.31	19503.1	48092.3	4893.95	46.0293	2204.32	5822.96	2650.99	3635.1	4606.41	9027.69	9062.9	944.425	3914.28	99.2641	2607.83
PN0536_0003_S83	D10	T6	T6_D10	T6_D10_1	2510.52	70898.9	10642.6	11801	27756.6	141999	4180.31	15606.7	7057.57	1408.77	73060.4	443.663	6745.26	23592.2	1151.21	1284.93	28983.4	3106.3	15365.9	1272.1	10611.2	8309.36	1452.43	9667.54	0	12706.6	11930.6	2797.78	3244.91	22578.7	58091.2	25631	3872.59	0	2575.18	6057.65	1218.85	1624.78	4352.55	7433.36	4521.34	12731.4	2899.54	153.223	291.22
PN0536_0008_S6	D10	T6	T6_D10	T6_D10_2	10508.2	75782.8	12829.2	6651.38	23472.5	124313	3689.99	13339.6	5048.43	1371.22	48846.3	430.89	7654.88	15899.5	3245.74	1884.15	33895.4	2278.76	14162.4	1178.51	32847.7	6748.72	2104.82	42887	0	13712.5	13193.6	1938.45	3191.48	9977.68	23339.7	22864.4	3410.92	56.5063	6260.67	7713.47	1503.03	2863.94	3328.02	8109.64	2859.65	27922.2	6268.95	188.103	2353.54
PN0536_0016_S118	D10	T6	T6_D10	T6_D10_3	1412.79	154552	27314.6	13647.4	84097.9	341535	1956.47	47733.7	5079.86	1129.78	183685	1061.64	23516.1	47787.9	101.069	755.472	22610.5	2327.52	16299.1	4500.37	18899.5	27849.5	867.594	25625.2	0	11325.9	13373.9	1565.43	4552.6	11199.5	47335.6	45088.6	3773.19	25.3744	2004.93	10469.4	223.777	3408.22	7103.54	4356.81	3295.83	6283.08	2962.46	124.654	495.89
PN0536_0021_S12	D10	T6	T6_D10	T6_D10_4	20249.6	74634.9	25120	6289.25	58956.2	175620	2106.2	21307.5	5195.17	606.891	54749.2	134.307	11150.1	10333.1	355.103	2716.38	29507.8	2256.26	10681.8	1136.59	6481.87	6460.53	2143.11	6193.23	0	13133.9	5851.73	4921.56	6709.03	13020.6	24604.3	28077.1	3705.09	0	2918.41	2429.83	139.178	2298.22	3326.92	8516.73	6678.07	3922.78	5098.4	75.7007	410.063
PN0536_0027_S90	D21	T6	T6_D21	T6_D21_1	4067.62	50519	12222.2	13891.7	89707.8	117892	1697.83	15464.5	5714.96	516.334	46097.3	177.785	14695.3	19026.8	565.191	1578.09	33994.3	7744.21	13582.8	178.183	66682.3	9631.85	3647.37	25851.8	0	13802.1	7654.99	2631.37	7993.76	11350.4	11640.9	31918.6	12202.6	8.40071	5348.46	4839.56	1110.97	2694.95	3683.44	9232.64	5571.35	11581.9	4539.48	130.918	1428.3
PN0536_0032_S17	D21	T6	T6_D21	T6_D21_2	11223.5	103326	17854.6	9522.21	52790.2	297738	3921.04	28122.1	9331.71	1267.9	85275.1	1584.23	37241.9	27131.6	232.67	1431.81	62003.4	2990.97	16126	2417.25	14964.1	15000.3	1591.67	40202.1	0	10954.1	10252.8	2400.55	3593.47	10012.6	25820.4	44663.8	3189.32	12.349	2076.26	4292.24	446.893	4262	5207.72	5710.05	6305.96	10772	2431.9	298.337	1341.81
PN0536_0040_S123	D21	T6	T6_D21	T6_D21_3	2671.59	22287.2	7823.69	4573.89	169875	101080	8909.53	17686.5	6408.44	1691.28	27467.1	546.36	38029.7	26669.8	691.388	607.783	25906.6	11290.2	6211.84	1397.53	45578.1	10850.8	990.814	8531.14	0	18112.3	3939.68	1694.24	4157.22	12421.6	13271.6	32838.4	21929.5	20.0959	1068.6	3143.35	1120.28	2206.05	3631.65	7937.64	789.671	3417.04	4667.27	37.9956	312.86
PN0536_0045_S26	D21	T6	T6_D21	T6_D21_4	4358.71	20326.8	6455.88	5162.36	100487	63877.5	7642.98	9885.61	6174.84	1051.88	26072.3	1124	28647.4	21170.6	4222.06	1393.27	85232.9	4258.79	5522.35	859.108	701.982	14040	3494.99	10639.5	0	12581.1	4417.99	1755.29	3595.4	14563.3	11336	43062.8	7373.26	5.06746	18134.2	2502.39	1558.07	3512.41	4855.29	5875.13	40880	177.569	6805.98	718.573	677.27
PN0536_0051_S32	D32	T6	T6_D32	T6_D32_1	2039.28	28575	6653.86	5291.2	113145	52307.3	4727.53	11408.8	7421.27	1730.27	29837	677.593	6540.14	7836.41	1308.85	415.762	20770.8	7398.06	5018.41	1001.88	42975.4	6806.51	877.987	31073.4	5.60695	13045.2	6804.23	1912.99	3119.75	5580.74	7277.14	27225.1	5616.9	40.0093	9490.02	6032.4	3337.55	1313.37	3818.9	5038.36	8584.87	18140.7	4616.37	153.496	815.398
PN0536_0056_S37	D32	T6	T6_D32	T6_D32_2	1546.68	24773.5	6013.3	3914.88	88152.6	48856.7	4491.95	6525.63	6254.47	1268.06	18720.3	492.761	50378.9	3379.62	4373.53	469.348	67001.9	5593.79	2067.93	263.338	82516.2	11595.9	1804.93	21497.7	0	13718.5	5134	2108.1	2922.13	6280.63	8012.57	31893.9	7365.26	32.0703	11211.9	2590.85	1594.9	1394.12	5793.47	5300.75	9580.18	23725.3	4795.91	287.052	1036.94
PN0536_0064_S125	D32	T6	T6_D32	T6_D32_3	1264.58	30833.4	18636.8	4800.11	344279	348654	2014.17	46385.2	6109.84	466.673	55943	121.896	45912.5	26617.8	142.172	358.242	12282.2	3719.92	2569.16	469.445	18407.6	15818.3	3580.84	62668.7	0	17709.7	2499.69	2346.12	4471.65	22424.9	12615.6	42759.4	3871.6	31.2858	555.778	4611.84	477.286	3739.25	6473.31	9375.36	443.228	138.291	4276.73	85.1449	1627.81
PN0536_0069_S128	D32	T6	T6_D32	T6_D32_4	3739.59	66236.4	15962.4	5618.62	108119	171387	6286.97	25118.7	4074.2	658.267	57126.7	544.563	5538.42	3556.92	122.503	495.967	59160.9	2614.59	7072.27	1746.24	44710.2	16702.8	2765.25	232975	0	12967	4438.73	2136.96	2746.77	12131.3	8882.27	47170.8	10507.7	10.1522	2689.31	6122.57	501.991	4018.43	8936.15	9380.68	6480	30606.9	5431.48	305.783	1072.07
[truncated: 2,172 more columns]

## Sheet: supp_TableS6_fullstats
pairs	Df	SumsOfSqs	F.Model	R2	p.value	sig	adjusted_p
T1_D10 vs T1_D21	1	0.0782723	1.23542	0.170746	0.118		0.164127
T1_D10 vs T1_D32	1	0.0924443	1.48353	0.198239	0.042		0.0774217
T1_D10 vs T2_D10	1	0.0669491	0.957029	0.137563	0.565		0.612
T1_D10 vs T2_D21	1	0.0857375	1.43554	0.193065	0.024		0.07344
T1_D10 vs T2_D32	1	0.0862767	1.4287	0.192321	0.029		0.07344
T1_D10 vs T3_D10	1	0.0791607	1.17062	0.189709	0.07		0.1071
T1_D10 vs T3_D21	1	0.077941	1.24833	0.172223	0.034		0.07344
T1_D10 vs T3_D32	1	0.0937706	1.57017	0.207416	0.026		0.07344
T1_D10 vs T4_D10	1	0.0751652	1.13091	0.158593	0.023		0.07344
T1_D10 vs T4_D21	1	0.0905946	1.48647	0.198554	0.024		0.07344
T1_D10 vs T4_D32	1	0.0861815	1.43713	0.193237	0.02		0.07344
T1_D10 vs T5_D10	1	0.0753379	1.18589	0.16503	0.034		0.07344
T1_D10 vs T5_D21	1	0.082329	1.40023	0.189215	0.021		0.07344
T1_D10 vs T5_D32	1	0.0961919	1.62328	0.212937	0.028		0.07344
T1_D10 vs T6_D10	1	0.0718853	1.13887	0.159531	0.035		0.07344
T1_D10 vs T6_D21	1	0.0794675	1.22375	0.169407	0.02		0.07344
T1_D10 vs T6_D32	1	0.0876846	1.31746	0.180043	0.03		0.07344
T1_D21 vs T1_D32	1	0.0509327	0.918686	0.132783	0.947		0.947
T1_D21 vs T2_D10	1	0.0908185	1.43968	0.193514	0.062		0.0998526
T1_D21 vs T2_D21	1	0.0559004	1.05768	0.149862	0.235		0.278721
T1_D21 vs T2_D32	1	0.0551931	1.03135	0.146679	0.3		0.34
T1_D21 vs T3_D10	1	0.107066	1.80322	0.265053	0.03		0.07344
T1_D21 vs T3_D21	1	0.0489737	0.881402	0.128085	0.943		0.947
T1_D21 vs T3_D32	1	0.0564919	1.06897	0.15122	0.155		0.200975
T1_D21 vs T4_D10	1	0.0908555	1.52465	0.20262	0.021		0.07344
T1_D21 vs T4_D21	1	0.0575714	1.06469	0.150706	0.165		0.212143
T1_D21 vs T4_D32	1	0.0572398	1.07806	0.152311	0.209		0.251787
T1_D21 vs T5_D10	1	0.0623313	1.10018	0.15495	0.18		0.225738
T1_D21 vs T5_D21	1	0.0552199	1.06348	0.150561	0.255		0.297824
T1_D21 vs T5_D32	1	0.0611658	1.16762	0.162902	0.072		0.109069
T1_D21 vs T6_D10	1	0.0785658	1.39681	0.188839	0.055		0.095625
T1_D21 vs T6_D21	1	0.0589153	1.01465	0.144647	0.338		0.377474
T1_D21 vs T6_D32	1	0.0628498	1.05306	0.149306	0.24		0.282462
T1_D32 vs T2_D10	1	0.10697	1.72424	0.223224	0.027		0.07344
T1_D32 vs T2_D21	1	0.0537801	1.03805	0.147491	0.229		0.273727
T1_D32 vs T2_D32	1	0.0504243	0.96097	0.138051	0.781		0.791344
T1_D32 vs T3_D10	1	0.127031	2.18555	0.304159	0.032		0.07344
T1_D32 vs T3_D21	1	0.0535676	0.982526	0.140712	0.576		0.612
T1_D32 vs T3_D32	1	0.0503133	0.971226	0.139319	0.7		0.728571
T1_D32 vs T4_D10	1	0.0998594	1.7056	0.221345	0.034		0.07344
T1_D32 vs T4_D21	1	0.0567333	1.06983	0.151323	0.129		0.176223
T1_D32 vs T4_D32	1	0.0546425	1.04977	0.148909	0.152		0.200483
T1_D32 vs T5_D10	1	0.0734324	1.32043	0.180376	0.031		0.07344
T1_D32 vs T5_D21	1	0.0595632	1.17065	0.163256	0.029		0.07344
T1_D32 vs T5_D32	1	0.0525973	1.02445	0.145841	0.305		0.343125
T1_D32 vs T6_D10	1	0.0819124	1.48382	0.198271	0.031		0.07344
T1_D32 vs T6_D21	1	0.0625581	1.0971	0.154584	0.202		0.247248
T1_D32 vs T6_D32	1	0.0572014	0.975472	0.139843	0.572		0.612
T2_D10 vs T2_D21	1	0.0932571	1.56866	0.207257	0.019		0.07344
T2_D10 vs T2_D32	1	0.0983003	1.63524	0.21417	0.025		0.07344
T2_D10 vs T3_D10	1	0.0685422	1.01856	0.169237	0.453		0.498626
T2_D10 vs T3_D21	1	0.086923	1.39834	0.189007	0.026		0.07344
T2_D10 vs T3_D32	1	0.104259	1.75386	0.226192	0.039		0.0755316
T2_D10 vs T4_D10	1	0.0741095	1.11966	0.157263	0.09		0.129906
T2_D10 vs T4_D21	1	0.102191	1.68432	0.21919	0.03		0.07344
T2_D10 vs T4_D32	1	0.101553	1.70126	0.220906	0.024		0.07344
T2_D10 vs T5_D10	1	0.0890709	1.40814	0.190081	0.028		0.07344
T2_D10 vs T5_D21	1	0.104234	1.78111	0.228902	0.026		0.07344
T2_D10 vs T5_D32	1	0.107886	1.8291	0.233628	0.029		0.07344
T2_D10 vs T6_D10	1	0.0789202	1.25579	0.173074	0.058		0.0975165
T2_D10 vs T6_D21	1	0.0817451	1.26417	0.174028	0.051		0.0907326
T2_D10 vs T6_D32	1	0.0930261	1.40351	0.189573	0.064		0.102
T2_D21 vs T2_D32	1	0.0501071	1.00448	0.143406	0.517		0.565007
T2_D21 vs T3_D10	1	0.109206	1.98496	0.284177	0.025		0.07344
T2_D21 vs T3_D21	1	0.0484186	0.932356	0.134493	0.771		0.78642
T2_D21 vs T3_D32	1	0.0534192	1.08542	0.153191	0.126		0.173676
T2_D21 vs T4_D10	1	0.0936532	1.6736	0.218098	0.032		0.07344
T2_D21 vs T4_D21	1	0.0603032	1.19551	0.166147	0.059		0.0981196
T2_D21 vs T4_D32	1	0.0623264	1.26006	0.173561	0.04		0.0765
T2_D21 vs T5_D10	1	0.0697017	1.31453	0.179715	0.029		0.07344
T2_D21 vs T5_D21	1	0.0593699	1.2294	0.170056	0.03		0.07344
T2_D21 vs T5_D32	1	0.0569311	1.16775	0.162917	0.06		0.0987097
T2_D21 vs T6_D10	1	0.0717351	1.3634	0.185159	0.062		0.0998526
T2_D21 vs T6_D21	1	0.0589002	1.08207	0.15279	0.167		0.212925
T2_D21 vs T6_D32	1	0.0609756	1.08786	0.153482	0.155		0.200975
T2_D32 vs T3_D10	1	0.117516	2.10554	0.296323	0.035		0.07344
T2_D32 vs T3_D21	1	0.050478	0.959752	0.1379	0.747		0.767054
T2_D32 vs T3_D32	1	0.0493478	0.989361	0.141552	0.6		0.633103
T2_D32 vs T4_D10	1	0.0983453	1.73686	0.224491	0.032		0.07344
T2_D32 vs T4_D21	1	0.0587564	1.14972	0.160807	0.088		0.128229
T2_D32 vs T4_D32	1	0.0593978	1.18496	0.164922	0.029		0.07344
T2_D32 vs T5_D10	1	0.0702731	1.30893	0.179087	0.032		0.07344
T2_D32 vs T5_D21	1	0.0576818	1.17826	0.164143	0.033		0.07344
T2_D32 vs T5_D32	1	0.0543255	1.09934	0.154851	0.152		0.200483
T2_D32 vs T6_D10	1	0.0784258	1.47201	0.197003	0.023		0.07344
T2_D32 vs T6_D21	1	0.0586832	1.0651	0.150756	0.285		0.327857
T2_D32 vs T6_D32	1	0.0615627	1.08549	0.153199	0.15		0.200483
T3_D10 vs T3_D21	1	0.101259	1.73774	0.257911	0.03		0.07344
T3_D10 vs T3_D32	1	0.123057	2.23696	0.309102	0.028		0.07344
T3_D10 vs T4_D10	1	0.0825219	1.30772	0.20732	0.042		0.0774217
T3_D10 vs T4_D21	1	0.119016	2.10713	0.296481	0.029		0.07344
T3_D10 vs T4_D32	1	0.118057	2.13452	0.299182	0.027		0.07344
T3_D10 vs T5_D10	1	0.102546	1.72111	0.256075	0.034		0.07344
T3_D10 vs T5_D21	1	0.114537	2.12489	0.298234	0.03		0.07344
T3_D10 vs T5_D32	1	0.120256	2.20831	0.306356	0.026		0.07344
T3_D10 vs T6_D10	1	0.0843563	1.42758	0.222102	0.036		0.07344
T3_D10 vs T6_D21	1	0.0974739	1.59084	0.241371	0.034		0.07344
T3_D10 vs T6_D32	1	0.108352	1.71405	0.255293	0.024		0.07344
T3_D21 vs T3_D32	1	0.0573031	1.10354	0.155351	0.102		0.1445
T3_D21 vs T4_D10	1	0.0894488	1.52459	0.202615	0.031		0.07344
T3_D21 vs T4_D21	1	0.0588488	1.10716	0.155781	0.066		0.103041
T3_D21 vs T4_D32	1	0.060267	1.15511	0.161438	0.032		0.07344
T3_D21 vs T5_D10	1	0.0639545	1.14747	0.160542	0.049		0.0882
T3_D21 vs T5_D21	1	0.0565708	1.10916	0.156019	0.082		0.120635
T3_D21 vs T5_D32	1	0.0575631	1.1185	0.157126	0.073		0.1095
T3_D21 vs T6_D10	1	0.0673599	1.2175	0.168688	0.052		0.0914483
T3_D21 vs T6_D21	1	0.05399	0.944804	0.136045	0.727		0.751561
T3_D21 vs T6_D32	1	0.0625321	1.06415	0.150641	0.2		0.247248
T3_D32 vs T4_D10	1	0.101666	1.81695	0.232437	0.027		0.07344
T3_D32 vs T4_D21	1	0.0636268	1.26152	0.173727	0.033		0.07344
T3_D32 vs T4_D32	1	0.0592753	1.1985	0.166493	0.036		0.07344
T3_D32 vs T5_D10	1	0.0706592	1.33272	0.181749	0.036		0.07344
T3_D32 vs T5_D21	1	0.0648779	1.3436	0.182962	0.024		0.07344
T3_D32 vs T5_D32	1	0.0553269	1.13496	0.15907	0.057		0.0975165
T3_D32 vs T6_D10	1	0.081748	1.55385	0.205703	0.038		0.0755065
T3_D32 vs T6_D21	1	0.0649498	1.19332	0.165893	0.026		0.07344
T3_D32 vs T6_D32	1	0.0623865	1.11313	0.15649	0.104		0.145982
T4_D10 vs T4_D21	1	0.0935501	1.63605	0.214253	0.041		0.0774217
T4_D10 vs T4_D32	1	0.102566	1.82495	0.233222	0.03		0.07344
T4_D10 vs T5_D10	1	0.0814881	1.36352	0.185172	0.024		0.07344
T4_D10 vs T5_D21	1	0.0936283	1.70138	0.220919	0.032		0.07344
T4_D10 vs T5_D32	1	0.0989761	1.78361	0.229149	0.029		0.07344
T4_D10 vs T6_D10	1	0.0749896	1.26343	0.173944	0.029		0.07344
T4_D10 vs T6_D21	1	0.0849049	1.38797	0.187869	0.02		0.07344
T4_D10 vs T6_D32	1	0.0922538	1.46924	0.196706	0.032		0.07344
T4_D21 vs T4_D32	1	0.0527811	1.04137	0.147893	0.274		0.317591
T4_D21 vs T5_D10	1	0.0714951	1.318	0.180104	0.027		0.07344
T4_D21 vs T5_D21	1	0.0553025	1.11693	0.15694	0.091		0.130121
T4_D21 vs T5_D32	1	0.0597984	1.19658	0.166271	0.037		0.0744868
T4_D21 vs T6_D10	1	0.0783196	1.45478	0.195147	0.031		0.07344
T4_D21 vs T6_D21	1	0.0599571	1.07732	0.152221	0.201		0.247248
T4_D21 vs T6_D32	1	0.0664254	1.15982	0.16199	0.079		0.11735
T4_D32 vs T5_D10	1	0.0738493	1.3864	0.187697	0.022		0.07344
T4_D32 vs T5_D21	1	0.0583084	1.20138	0.166826	0.058		0.0975165
T4_D32 vs T5_D32	1	0.0562883	1.14884	0.160703	0.032		0.07344
T4_D32 vs T6_D10	1	0.0853679	1.61505	0.212086	0.02		0.07344
T4_D32 vs T6_D21	1	0.063548	1.16227	0.162277	0.027		0.07344
T4_D32 vs T6_D32	1	0.0593756	1.05474	0.149508	0.292		0.333403
T5_D10 vs T5_D21	1	0.0639727	1.22799	0.169894	0.027		0.07344
T5_D10 vs T5_D32	1	0.071617	1.36266	0.185077	0.039		0.0755316
T5_D10 vs T6_D10	1	0.0582671	1.03276	0.14685	0.368		0.408
T5_D10 vs T6_D21	1	0.0644307	1.10636	0.155686	0.067		0.103545
T5_D10 vs T6_D32	1	0.0740161	1.2366	0.170881	0.066		0.103041
T5_D21 vs T5_D32	1	0.0640005	1.33823	0.182364	0.027		0.07344
T5_D21 vs T6_D10	1	0.0794046	1.53627	0.203851	0.029		0.07344
T5_D21 vs T6_D21	1	0.0580481	1.08492	0.153131	0.204		0.247714
T5_D21 vs T6_D32	1	0.0694464	1.25985	0.173537	0.027		0.07344
T5_D32 vs T6_D10	1	0.081166	1.55646	0.205978	0.034		0.07344
T5_D32 vs T6_D21	1	0.0588954	1.09135	0.153899	0.171		0.216223
T5_D32 vs T6_D32	1	0.0540792	0.972931	0.13953	0.575		0.612
T6_D10 vs T6_D21	1	0.0634634	1.09746	0.154627	0.143		0.193619
T6_D10 vs T6_D32	1	0.0819222	1.3781	0.186783	0.046		0.0837857
T6_D21 vs T6_D32	1	0.0584641	0.954303	0.137225	0.675		0.707363

## Sheet: supp_TableS7_LEfSe_function
Function	Treatment	LDA score	p.adj	Additional timepoint	Name	Class
		D32
map00720	T1	2.754	0.042		Other carbon fixation pathways	Metabolism; Energy metabolism
map01212	T1	2.517	0.017		Fatty acid metabolism	Fatty acid metabolism		Table S7: LEfSe results for functional profiles of the microbiomes at D32, and whether the genus was also associated at additional timepoints. Significantly associated microbial-associated pathways (MAPs), CAZy enzyme families, and enzyme classifications (EC numbers) are shown for each treatment.
map00071	T3	2.399	0.016		Fatty acid degradation	Metabolism; Lipid metabolism
map00130	T4	2.029	0.013		Ubiquinone and other terpenoid-quinone biosynthesis	Metabolism; Metabolism of cofactors and vitamins
map00920	T4	2.369	0.049	D21	Sulfur metabolism	Metabolism; Energy metabolism
map02020	T4	3.041	0.028		Two-component system	Environmental Information Processing; Signal transduction
map00362	T6	2.089	0.037		Benzoate degradation	Metabolism; Xenobiotics biodegradation and metabolism
GH88	T1	3.030	0.033		Glycoside Hydrolase Family 88
CE10	T3	3.608	0.020		Carbohydrate Esterase Family 10
GT66	T4	2.208	0.025		Glycosyl Transferase Family 66
GT17	T5	2.457	0.024		Glycosyl Transferase Family 17

## Sheet: supp_TableS8_LEfSe
	Treatment	LDA score	p.adj	Additional timepoint	Name	Class
		D32
map01212	Soy	2.26	0.007	D21 D10	Fatty acid metabolism	Fatty acid metabolism
map00061	Soy	2.26	0.015		Fatty acid biosynthesis	Metabolism; Lipid metabolism
map02020	NoSoy	2.71	0.011		Two-component system	Environmental Information Processing; Signal transduction
map00920	NoSoy	2.12	0.004	D21	Sulfur metabolism	Metabolism; Energy metabolism
map00190	NoSoy	2.40	0.008		Oxidative phosphorylation	Metabolism; Energy metabolism			Table S8: LEfSe results for functional profiles of the microbiomes at D32, and whether the genus was also associated at additional timepoints. Significantly associated microbial associated pathways (MAPs), CAZy enzyme families, and enzyme classifications (EC numbers) are shown for Soy and Non soy based diets
map00030	NoSoy	2.25	0.021		Pentose phosphate pathway	Metabolism; Carbohydrate metabolism
GT2	Soy	3.52	0.038	D21	GlycosylTransferase Family 2
GT1	Soy	3.56	0.015		GlycosylTransferase Family 1
CBM20	NoSoy	2.50	0.009	D21 D10	Carbohydrate-Binding Module Family 20
GT20	NoSoy	2.30	0.026		GlycosylTransferase Family 20
1.17.1.10	Soy	2.03	0.021		Formate dehydrogenase (NADP+)	Oxidoreductases
3.2.1.31	Soy	2.11	0.028		Beta-glucuronidase	Hydrolases
3.4.16.4	Soy	2.56	0.021		Serine-type D-Ala-D-Ala carboxypeptidase	Hydrolases
3.5.2.6	Soy	2.05	0.002		Beta-lactamase	Hydrolases
3.6.1.45	Soy	2.01	0.001		UDP-sugar diphosphatase	Hydrolases
4.1.1.37	Soy	2.01	0.013		Uroporphyrinogen decarboxylase	Lyases
6.2.1.3	Soy	2.29	0.043		Long-chain-fatty-acid---CoA ligase	Ligases
6.4.1.2	Soy	2.11	0.043		Acetyl-CoA carboxylase	Ligases
1.12.1.3	NoSoy	2.29	0.003		Hydrogen dehydrogenase (NADP+)	Oxidoreductases
1.2.7.8	NoSoy	2.14	0.003	D21	Indolepyruvate ferredoxin oxidoreductase	Oxidoreductases
1.3.5.4	NoSoy	2.29	0.043		Succinate dehydrogenase	Oxidoreductases
1.6.5.3	NoSoy	2.32	0.024		NADH:ubiquinone reductase (H+-translocating)	Translocases
1.8.5.3	NoSoy	2.13	0.000	D21 D10	Respiratory dimethylsulfoxide reductase	Oxidoreductases
1.8.5.5	NoSoy	2.05	0.000	D21 D10	Thiosulfate reductase (quinone)	Oxidoreductases
1.97.1.9	NoSoy	2.05	0.006	D21	Selenate reductase (cytochrome c)	Oxidoreductases
2.7.11.1	NoSoy	2.17	0.024		Non-specific serine/threonine protein kinase	Transferases
2.7.13.3	NoSoy	2.58	0.038		Histidine kinase	Transferases

## Sheet: supp_TableS9_correlation
Enzyme	Spearman_rho	FDR	Enzyme name	Class
1.12.1.3	-0.682147	0.0125	Succinate dehydrogenase	Oxidoreductases
1.2.1.3	-0.642931	0.0199	Beta-glucuronidase	Oxidoreductases
1.3.5.4	0.663571	0.0151	Beta-lactamase	Oxidoreductases
1.6.5.3	-0.719298	0.00746	Aldehyde dehydrogenase (NAD+)	Translocases
1.97.1.9	-0.618163	0.0266	Hydrogen dehydrogenase (NADP+)	Oxidoreductases
2.1.1.107	-0.775026	0.00331	Selenate reductase (cytochrome c)	Transferases
2.7.1.208	0.748194	0.005	Shikimate kinase	Transferases
2.7.1.71	-0.80805	0.0014	2-iminoacetate synthase	Transferases
2.7.13.3	-0.847265	<1e-300	Uroporphyrinogen decarboxylase	Transferases
2.8.1.6	-0.692466	0.0108	Beta-ureidopropionase	Transferases
3.1.11.2	0.74613	0.00516	Serine-type D-Ala-D-Ala carboxypeptidase	Hydrolases
3.1.3.90	0.688338	0.0115	Uroporphyrinogen-III synthase	Hydrolases
3.2.1.31	0.675955	0.0131	Maltose phosphotransferase	Hydrolases
3.4.16.4	0.770898	0.00361	Long-chain-fatty-acid---CoA ligase	Hydrolases
3.5.1.6	0.659443	0.0161	Exodeoxyribonuclease III	Hydrolases
3.5.2.6	0.74613	0.00516	Uroporphyrinogen-III C-methyltransferase	Hydrolases
3.5.4.33	0.624355	0.025	NADH:ubiquinone reductase (H+-translocating)	Hydrolases
4.1.1.37	-0.558308	0.0493	Biotin synthase	Lyases
4.1.99.19	-0.609907	0.0286	Maltose 6'-phosphate phosphatase	Lyases
4.2.1.75	-0.76677	0.0039	tRNA(adenine34) deaminase	Lyases
6.2.1.3	0.855521	<1e-300	Histidine kinase	Ligases
g__Adlercreutzia	0.568627	0.0856
g__Arabiibacter	0.514964	0.13
g__Ruminococcus	0.593395	0.0832

## Sheet: supp_figureS1_pcafunction
A: CAZy										B:KEGG pathway
C:ENZYME Commision
